1 **The novel microRNAs hsa-miR-nov7 and hsa-miR-nov3 are over-**  
2 **expressed in locally advanced breast cancer**

3  
4  
5  
6  
7 Deepak Poduval<sup>1</sup>, Zuzana Sichmanova<sup>1</sup>, Anne Hege Straume<sup>1, \*</sup>, Per Eystein Lønning<sup>1,2</sup>,  
8 Stian Knappskog<sup>1,2,‡</sup>

9  
10  
11  
12  
13 <sup>1</sup> Section of Oncology, Department of Clinical Science, University of Bergen, 5020 Bergen,  
14 Norway.

15 <sup>2</sup> Department of Oncology, Haukeland University Hospital, 5021 Bergen, Norway.

16  
17  
18  
19 \* Current address: Norwegian Institute of Marine Research, 5005 Bergen, Norway.

20  
21 ‡ Corresponding author: Stian Knappskog, Section of Oncology, Department of Clinical  
22 Science, University of Bergen, 5020 Bergen, Norway. E-mail: [stian.knappskog@uib.no](mailto:stian.knappskog@uib.no).  
23 Phone +47 55586447.

24  
25  
26  
27 Author e-mails:

28 Deepak Poduval poduval.deepak.b@gmail.com

29 Zuzana Sichmanova zuzana.sichmanova@uib.no

30 Anne Hege Straume anne.hege.straume@hi.no

31 Per Eystein Lønning per.lonning@helse-bergen.no

32 Stian Knappskog stian.knappskog@uib.no

33  
34  
35  
36  
37  
38  
39  
40 Keywords: miRNA; in silico prediction; breast cancer; prognosis

## 48 **Abstract**

49

50 miRNAs are an important class of small non-coding RNAs, which play a versatile role in gene  
51 regulation at the post-transcriptional level. Expression of miRNAs is often deregulated in  
52 human cancers.

53 We analyzed small RNA massive parallel sequencing data from 50 locally advanced  
54 breast cancers aiming to identify novel breast cancer related miRNAs. We successfully  
55 predicted 10 novel miRNAs, out of which 2 (*hsa-miR-nov3* and *hsa-miR-nov7*) were  
56 recurrent. Applying high sensitivity qPCR, we detected these two microRNAs in 206 and 214  
57 out of 223 patients in the study from which the initial cohort of 50 samples were drawn. We  
58 found *hsa-miR-nov3* and *hsa-miR-nov7* both to be overexpressed in tumor versus normal  
59 breast tissue in a separate set of 13 patients ( $p=0.009$  and  $p=0.016$ , respectively) from whom  
60 both tumor tissue and normal tissue were available. We observed *hsa-miR-nov3* to be  
61 expressed at higher levels in ER-positive compared to ER-negative tumors ( $p=0.037$ ).  
62 Further stratifications revealed particularly low levels in the her2-like and basal-like cancers  
63 compared to other subtypes ( $p=0.009$  and  $0.040$ , respectively).

64 We predicted target genes for the 2 microRNAs and identified inversely correlated  
65 genes in mRNA expression array data available from 203 out of the 223 patients. Applying  
66 the KEGG and GO annotations to target genes revealed pathways essential to cell  
67 development, communication and homeostasis.

68 Although a weak association between high expression levels of *hsa-miR-nov7* and  
69 poor survival was observed, this did not reach statistical significance. *hsa-miR-nov3*  
70 expression levels had no impact on patient survival.

71

72

73

74

75

76

77

78

79

80

81

82

83

84

85

86

87

88

89

90

91

92

93

94

## 95 Introduction

96

97 miRNAs are an important class of small non-coding RNAs, playing a versatile role in the  
98 gene regulation at the post – transcriptional level [1-5]. These molecules have proven to be  
99 involved in vital cellular functions, such as development, differentiation and metabolism [6-8].  
100 In recent years there has been increased focus on the role of miRNAs in cancer [9], and the  
101 implementation of next generation sequencing (NGS) has lead to the identification of multiple  
102 novel miRNAs as well as linked individual miRNA expression and combined signatures to  
103 tumor characteristics [10]. Currently there are 2656 distinct human miRNAs identified in the  
104 miRbase v22 [11], including more than 700 found to be deregulated in cancers [12].

105 Breast cancer is the most common malignancy in women. While outcome has  
106 improved significantly over the last three decades, resistance to therapy still presents a major  
107 challenge causing breast cancer related deaths [13]. As for chemoresistance in general, the  
108 underlying biological mechanisms remain poorly understood [14].

109 Merging evidence has indicated miRNA deregulation to play a role in breast cancer  
110 biology and outcome. Dysregulation of miRNAs may affect signal transduction pathways by  
111 targeting oncogenes and tumor suppressor genes [15], important to cancer development,  
112 progression, metastasis and potentially therapy response [16, 17]. Thus, while miR-10b,  
113 miR-125b, and miR-145 are generally downregulated, other miRNAs, like miR-21 and miR-  
114 155, are generally upregulated in breast cancer as compared to normal breast tissue [18].  
115 Further, several miRNAs have revealed strong associations to clinical parameters [19, 20]:  
116 For example, differential expression of miR-210, miR-21, miR-106b\*, miR-197, miR-let-7i,  
117 and miR-210, have been identified as a signature with prognostic value and also linked to  
118 invasiveness [21]. Moreover, miR-21 has been found linked to breast cancer metastasis and  
119 poor survival [22], while mir-29a overexpression has been shown to reduce the growth rate  
120 of breast cancer cells [23].

121 miRNAs are also known to be differentially regulated across different subclasses of  
122 breast cancer. E.g. while members of the mir-181 family are up regulated in breast cancer in  
123 general, miR-181c in particular is activated by the expression of HER2 gene [24]. Also, miR-  
124 140 has been found suppressed by estrogen stimulation in ER $\alpha$ -positive breast cancer cells,  
125 most likely due to ER response elements in the flanking element of the miR-140 promoter  
126 [25].

127 In the present study, we analyzed global miRNA expression in 50 locally advanced  
128 breast cancers using NGS, aiming to identify novel, potentially breast cancer specific  
129 miRNAs. We identified and validated two novel miRNAs (one not previously described and  
130 one not previously reported in breast cancer), and subsequently evaluated their expression  
131 in an extended patient series (n=223), by high sensitivity qPCR. Both were found over-  
132 expressed in breast cancer as compared to normal breast tissue. Considering different  
133 breast cancer subtypes, *hsa-miR-nov3* was expressed at particular high levels in ER-positive  
134 tumors contrasting lower levels in basal-like and Her2-like tumors. No similar patterns were  
135 observed for *hsa-miR-nov7*.

136

137

138

139

140

141

## 142 **Materials and Methods**

143

### 144 **Patients**

145

146 In the present work we have analyzed biopsy material from two breast cancer studies.

147

148 1) In the first study, incisional biopsies were collected before chemotherapy from 223  
149 patients with locally advanced breast cancer in a prospective study designed to identify the  
150 response to epirubicin (n = 109) and paclitaxel (n = 114) monotherapy. Primary response to  
151 therapy as well as long-term follow up (>10 years or death) was recorded for all patients.  
152 This cohort has been described in detail previously [26].

153

154 2) In the second study, tumor breast tissue and normal breast tissue from tumor bearing and  
155 non-tumor bearing quadrants were collected from 46 anonymous breast cancer patients  
156 undergoing mastectomy, with the purpose of determining tissue estrogens. This cohort is  
157 described in detail in [27].

158

159 Using NGS, we analyzed miRNA expression in 50 patients from study 1). Next, candidate  
160 miRNAs were quantified using qPCR in all 223 patients from study 1), as well as 13  
161 randomly selected patients from study 2), where RNA was available from tumor tissue and  
162 matching normal breast tissue (7 ER-positive and 6 ER-negative tumors). In addition, mRNA  
163 expression array data was available for 203 out of the 223 patients in study 1).

164

165 All patients provided written informed consent, and the studies conducted in accordance to  
166 national laws, regulation and ethical permissions.

167

### 168 **Tissue Sampling and RNA extraction**

169

170 Tissue samples were snap-frozen in liquid nitrogen in the operating theatre and stored in  
171 liquid nitrogen until further processing. Total RNA was extracted from the biopsies using  
172 miRvana™ kit (ThermoFisher), according to the manufacturer's instructions. RNA integrity  
173 and concentration were determined using Bioanalyzer 2000 and Nanodrop ND2000  
174 spectrophotometer, respectively.

175

176

### 177 **miRNA-sequencing**

178

179 Sample preparation and single-end sequencing were performed at the core facility of the  
180 Norwegian Genomics Consortium in Oslo, on Illumina HiSeq 2500, 1x50bp. De-multiplexing  
181 was performed using the Illumina CASAVA software. FastQC was run on all samples with  
182 the main purpose to assess sequence quality.

183

184

### 185 **Novel miRNA prediction**

186

187 The raw sequencing files (fastq) were processed using the novel miRNA prediction algorithm  
188 mirdeep v2.0.0.5 [10]. Potential novel miRNAs were identified using the human reference

189 genome (hg19) and already identified miRNAs from humans and other hominids from  
190 miRbase 20 [28]. In the mirdeep2 algorithm, filtering parameters randfold P-value less than  
191 0.05 and scores greater than or equal to 10 were applied. Precursor structures obtained after  
192 filtering were manually identified based on the presence of 1-2 mismatches in the stem  
193 region, a loop sequence of 4–8 nt, and the presence of mature sequence in the stem region  
194 (See Suppl. Info.) [29].

195

196

### 197 **cDNA synthesis and qPCR**

198

199 cDNA from miRNAs was prepared using Exiqon's Universal cDNA synthesis kit II, with 20 ng  
200 of total RNA as input. qPCR was performed using Exiqon's miRCURY LNA™ Universal RT  
201 microRNA PCR system, with custom Pick-&-Mix ready to use PCR plates with an inter-plate  
202 calibrator, on a LightCycler 480 instrument (Roche). Relative expression levels for each  
203 sample were calculated by dividing the expression of the gene of interest on the average  
204 expression of two reference miRNAs: miR-16-5p and miR-30b-5p.

205

206

### 207 **miRNA cloning and capillary sequencing**

208

209 End products from custom miRNA specific qPCR were cloned into pCR 2.1 TOPO-TA vector  
210 (Life Technologies) by TOPO-TA cloning according to the manufacturer's instructions. The  
211 generated plasmids were amplified by transformation and cultivation of *E. coli* TOP10 cells  
212 (Life Technologies). The plasmids were then isolated using the Qiagen miniprep kit  
213 according to the manufacturer's instructions.

214 Sequencing was performed using the BigDye v.1.3 system (Applied Biosystems) and  
215 the primers following thermocycling conditions as previously described [30]. Capillary  
216 electrophoresis and data collection were performed on an automated capillary sequencer  
217 (ABI3700).

218

219

### 220 **Target prediction and pathway analysis**

221

222 Target prediction was performed using the offline algorithm miRanda [31, 32] and the online  
223 algorithms miRDB [33] and TargetScanHuman Custom (Release 5.2) [34].

224 miRanda predicts gene targets based on position specific sequence complementarity  
225 between miRNA and mRNA using weighted dynamic programming, an extension of the  
226 Smith-Waterman algorithm [35]. Also, the miRanda algorithm uses the free energy estimation  
227 between duplex of miRNA:mRNA (Vienna algorithm [36]) as an additional filter.

228 The miRDB is an online database of animal miRNA targets, which uses SVM  
229 (Support Vector Machine) machine-learning algorithm trained with miRNA-target binding data  
230 from already known and validated miRNA-mRNA interactions [33, 37].

231 TargetScanHuman Custom predicts biological miRNA targets by searching for match  
232 for the seed region of the given miRNA that is present in the conserved 8-mer and 7-mer  
233 sites [34]. It also identifies sites with conserved 3' pairing from the mismatches in the seed  
234 region [38, 39].

235 An in-house pan-cancer panel of 283 tumor suppressor genes was used to filter  
236 target genes of interest. The panel was generated based on the tumor suppressors within the

237 CGPv2/3-panels [40], Roche's Comprehensive Cancer Design as well as a manual literature  
238 search (Supporting Table 1).

239 Further, we used GATHER, a functional gene enrichment tool, which integrates  
240 various available biological databases to find functional molecular patterns, in order to find  
241 biological context from the target gene list [41]. With the help of GATHER, we did KEGG  
242 pathway [42], and GO (gene ontology) enrichment analyses for the common genes predicted  
243 by all three prediction algorithms.

244

245

## 246 **mRNA expression**

247

248 In the interest of validating miRNA targets, we analyzed inverse correlations between miRNA  
249 expression and mRNA levels. mRNA expression levels were extracted from microarray  
250 analyses performed on a Human HT-12-v4 BeadChip (Illumina) after labeling (Ambion; Aros  
251 Applied Biotechnology). Illumina BeadArray Reader (Illumina) and the Bead Scan Software  
252 (Illumina) were used to scan BeadChips. Expression signals from the beads were normalized  
253 and further processed as previously described [43]. We re-annotated the data set using  
254 illuminaHumanv4.db from AnnotationDbi package, built under Bioconductor 3.3 in R [44], to  
255 select only probes with "Perfect" annotation[45]. The probes represented 21043 identified  
256 and unique genes (13340 represented by single probe and 7703 represented by multiple  
257 probes). In the cases of multiple probes targeting the same gene, we calculated fold  
258 difference for these probes. This was done to avoid losing potentially relevant biological  
259 information if expression of one probe was significantly higher than expression of another.  
260 However, for no genes did we find a fold difference >2 fold. Therefore, the mean expression  
261 for each such gene, was calculated based on the values from each probe, weighted  
262 according to the number of beads per probe.

263

264

## 265 **Statistics**

266

267 Expression levels of miRNAs in tumor versus normal tissue were compared by Wilcoxon  
268 rank tests for paired samples. Inverse correlations between miRNA expression and mRNA  
269 expression were assessed by Spearman tests. The potential impact of the novel miRNAs on  
270 long-term outcome (relapse-free survival and disease-specific survival) in breast cancer  
271 patients was calculated by Log-rank tests and illustrated by Kaplan-Meier curves, using the  
272 SPSS software v.19. All p-values are reported as two-sided.

273

274

275

276

277

278

279

280

281

282

283

284

## 285 Results

286

### 287 Novel miRNA prediction

288

289 In order to identify novel miRNAs, 50 patients with locally advanced breast cancer (from  
 290 study 1, see materials and methods) were subject to global miRNA-sequencing using  
 291 massive parallel sequencing. On average, the dataset resulted in 3 million reads per sample.  
 292 Using the miRNA identifier module in miRDeep2, we detected 10 novel miRNAs (Table 1).  
 293 Eight out of these 10 miRNAs were detected in a single sample only, while two were  
 294 expressed in two or more patients and therefore regarded as the most reliable predictions.  
 295 These two miRNAs, here temporarily named *hsa-miR-nov3* and *hsa-miR-nov7*, were found in  
 296 tumor samples from 2 and from 6 patients, respectively. For both of these novel miRNAs, we  
 297 identified precursor structures with not more than one or two mismatches in the stem region,  
 298 as well as the presence of mature miRNA sequences (Fig 1; Supporting Fig 1). Therefore,  
 299 we selected these two miRNAs for further analyses. Notably, while this work was conducted,  
 300 *hsa-miR-nov7* was identified by another team in lymphomas, and reported as miR-10393-3p  
 301 [46].

302

303

304 **Table 1:** Novel miRNA sequences as predicted by mirdeep v2.0.0.5 from massive parallel  
 305 sequencing of total miRNA in 50 locally advanced breast cancers.

306

| miRNA                  | Co-ordinate                   | Mature sequence              | Strand | Number of samples |
|------------------------|-------------------------------|------------------------------|--------|-------------------|
| <i>hsa-miR-nov2</i>    | chr2:36662749..36662809       | AAAAACTGCGATTACTTTTGCA       | -      | 1                 |
| <i>hsa-miR-nov3</i>    | chr3:186505088..18650514<br>9 | AAAGCAGGATTCAGACTACAAT<br>AT | +      | 2                 |
| <i>hsa-miR-nov3_2</i>  | chr3:132393169..13239322<br>4 | CAAAAACTGCAATTACTTTTGC       | +      | 1                 |
| <i>hsa-miR-nov4</i>    | chr4:155140075..15514013<br>4 | AAAAGTAATCGCTGTTTTTG         | +      | 1                 |
| <i>hsa-miR-nov7</i>    | chr7:138728845..13872890<br>3 | AATTACAGATTGTCTCAGAGA        | -      | 6                 |
| <i>hsa-miR-nov8</i>    | chr8:116546693..11654676<br>2 | TTAGAGCTTCAACCTCCAGTGTG<br>A | -      | 1                 |
| <i>hsa-miR-nov10</i>   | chr10:31840034..31840078      | CGCGGGTGCTTACTGACCCT         | +      | 1                 |
| <i>hsa-miR-nov10_2</i> | chr10:72163928..72163994      | GCGGCGGCGGCGGCGGCG           | +      | 1                 |
| <i>hsa-miR-nov17</i>   | chr17:36760852..36760906      | CCCAGCCCCACGCGTCCCATG        | -      | 1                 |
| <i>hsa-miR-nov20</i>   | chr20:26189318..26189366      | TGGCCGAGCGCGGCTCGTCGCC       | -      | 1                 |

307

308

309 **Fig 1: Predicted novel miRNAs.** Depiction of novel miRNAs (A) *hsa-miR-nov3* and (B) *hsa-*  
 310 *miR-nov7*, identified by miRDeep2, showing (i) predicted mature and star sequences, **exp**,  
 311 probabilistic model expected from Drosha/Dicer processing and **obs**, observed sequences  
 312 from sequencing data (ii) density plot for read counts for mature and star sequences as well  
 313 as (iii) miRNA secondary structure.

314  
315  
316  
317  
318  
319  
320  
321  
322  
323  
324  
325  
326  
327  
328  
329  
330  
331  
332  
333  
334  
335  
336  
337  
338  
339  
340  
341  
342  
343  
344  
345  
346  
347  
348  
349  
350  
351  
352  
353  
354  
355  
356  
357  
358  
359  
360  
361

## ***In-vitro* validation of novel micro RNAs**

Next, we aimed to validate our *in-silico* predictions and confirm that the sequences from which we identified *hsa-miR-nov3* and *hsa-miR-nov7* represented bona-fide novel miRNAs expressed in the patients. Utilizing total RNA from the patients found to express the two predicted novel miRNAs, we performed global poly-adenylation and cDNA synthesis followed by miRNA-specific qPCR amplification. For both miRNAs we observed positive qPCR reactions. Further, end products of the qPCRs were then ligated into carrier-plasmids and sequenced. We confirmed the resulting plasmids to contain the predicted miRNA sequences. Further, in both cases, the sequences were flanked by a poly A tail, confirming that the original molecules used as input in the poly-adenylation were present as short 22nt RNAs (Fig 2).

**Fig 2: miRNA sequences.** Chromatogram of capillary-sequenced qPCR products after *hsa-miR-nov3* (A) and *hsa-miR-nov7* (B) amplification. Highlighted background indicates the 22nt miRNA-sequence region (reverse complementary), followed by the Adenine homopolymer indicating *in vitro* adenylation at the expected site.

## **Overexpression of *hsa-miR-nov7* and *hsa-miR-nov3* in breast cancer**

Given that the sensitivity for the novel miRNAs was better in the qPCR than in the miRNA massive parallel sequencing (MPS) analysis, we aimed to assess whether the miRNAs were expressed in a limited number of breast cancer patients only (as indicated by their detection in 2 and 6 out of 50 patients in the MPS analysis), or if they were detectable in a higher fraction of patients, when applying a more sensitive detection method. We therefore performed qPCR to quantify the expression levels of *hsa-miR-nov7* and *hsa-miR-nov3* in tumor tissue across the entire cohort of patients from study 1 (n = 223). With this method, we detected *hsa-miR-nov7* and *hsa-miR-nov3* in 206 and 214 samples out of total 223 samples respectively, albeit at variable levels (Fig 3).

Interestingly, while no difference in the expression levels of *hsa-miR-nov7* was observed between breast cancer subgroups, we found a significant difference in the expression levels of *hsa-miR-nov3* related to estrogen receptor status. Thus, the expression levels of *hsa-miR-nov3* were higher in ER-positive as compared to ER-negative tumors (p=0.037; Fig 4A). Further, assessing the expression levels of the two miRNAs in mRNA-based subclasses of breast cancer according to the Perou classification [47], comparing all five classes, we observed a significant difference between the subtypes with respect to *miR-nov3* expression (p=0.041; Kruskal-Wallis test; Fig 4c). We found *hsa-miR-nov3* levels to be lower in HER2 like (p = 0.009; Mann-Whitney test) and basal-like (p = 0.04; Mann-Whitney) tumors as compared to tumors of the other classes.

Following the finding that the two miRNAs were detectable in more than 90 percent of patients, in order to assess whether the expression of these miRNAs were tumor specific we compared the levels of *hsa-miR-nov7* and *hsa-miR-nov3* expression in breast cancer tissue versus normal breast tissue. For this purpose, we randomly selected 13 patients from a study where samples of breast tumor tissue and matching normal tissue from a non-tumor bearing



362 quadrant of the same breast were available (study 2, see materials and methods) [27]. We  
363 detected expression of the novel miRNAs in both tumor- and normal tissue samples for all 13  
364 patients. Notably, we found *hsa-miR-nov3* expression to be elevated in tumor compared to  
365 normal tissue in 10 out of the 13 patients ( $p=0.009$ ; Wilcoxon test; Fig 5A). Similar findings  
366 were observed for *hsa-miR-nov7* with elevated expression in 10 out of 13 tumors (Wilcoxon:  
367  $p = 0.016$ ; Fig 5B). The level of overexpression (i.e. the ratio of expression levels in tumor  
368 versus normal tissue) for the two miRNAs did not correlate to each other ( $p>0.2$ ; Spearman).

369 Notably, overexpression of *hsa-miR-nov7* in tumor versus normal tissue was  
370 observed predominantly in ER-positive tumors (overexpression in 7 out of 7 ER-positive  
371 tumors, contrasting 3 out of 6 ER-negative tumors;  $p=0.070$ ; Fischer exact test).

372  
373

374 **Fig 3: Expression of novel miRNAs in breast cancer tissue.** Bars indicate the relative  
375 expression of *hsa-miR-nov3* (A) and *hsa-miR-nov7* (B) in 223 breast cancer patients.

376

377 **Fig 4: Expression of novel miRNAs in breast cancer tissue.** Expression levels stratified  
378 by ER-status (A, B) and by expression subtypes (C, D).

379

380 **Fig 5: Expression of novel miRNAs in breast cancer tissue.** Bars indicate the ratio of  
381 expression in tumour tissue vs. matched normal breast tissue in 13 breast cancer patients,  
382 for *hsa-miR-nov3* (A) and *hsa-miR-nov7* (B).

383

384

385

### 386 **hsa-miR-nov7 and hsa-miR-nov3 target prediction**

387

388 Based on our finding of both novel miRNAs to be overexpressed in breast cancer, we next  
389 aimed to elucidate the functional roles for *hsa-miR-nov7* and *hsa-miR-nov3* by identifying  
390 potential targets. We performed *in silico* target predictions using three different algorithms –  
391 miRanda, miRDB and TargetScanHumanCustom. miRanda, which predicts possible targets  
392 from human transcripts in general, predicted 9200 and 12315 target genes for *hsa-miR-nov7*  
393 and *hsa-miR-nov3*, respectively. miRDB, which contains curated and possible miRNA  
394 targets, predicted 570 and 530 target genes each for *hsa-miR-nov7* and *hsa-miR-nov3*,  
395 respectively, while TargetScanHuman custom predicted 633 target genes for *hsa-miR-nov7*,  
396 and 282 target genes for *hsa-miR-nov3*. For increased stringency in our predictions, we  
397 restricted the potential targets to the ones called by all three algorithms (Fig 6). This left a  
398 total of 97 and 180 potential targets for *hsa-miR-nov3* and *hsa-miR-nov7*, respectively.

399 The two lists of 97 and 180 predicted gene targets were then used for KEGG pathway  
400 analysis and GO enrichment analysis using GATHER. The top 10 KEGG pathways and GO  
401 terms for each microRNAs are listed in Table 2. The KEGG and GO annotations for *hsa-miR-*  
402 *nov3* showed pathways that are important in cell development and communication. Similar  
403 analysis for *hsa-miR-nov7* unveiled pathways playing a vital role in cell functions such as  
404 communication and homeostasis. Thus, both these miRNAs implied cell functions that are  
405 vital to cancer development and progression.

406 In order to further substantiate these *in-silico* predictions, we performed a complete  
407 Spearman correlation analysis between the expression levels of *hsa-miR-nov7* and *hsa-miR-*  
408 *nov3* and mRNA expression array data available for 203 out of the 233 patients in study 1.  
409 Assuming the miRNAs, in general, to execute their function by suppressing gene expression

410 (mRNA degradation), we restricted the analysis to genes which were negatively correlated to  
411 expression of the miRNAs. The top ranking negatively correlated genes are listed in Table 3.  
412 Notably, the only genes with Rho-values  $< -0.2$  were *RMND5A* for *hsa-miR-nov3* and *GLUD1*  
413 and *SASH1* for *hsa-miR-nov7*. Given that the two novel miRNAs were overexpressed in  
414 breast cancer tissue, we went on to restrict the correlation analysis to an in-house list of 283-  
415 tumor suppressor genes previously described (Supporting Table 2). Among these tumor  
416 suppressors, we found 115 to be negatively correlated to *hsa-miR-nov7* and 119 to *hsa-miR-*  
417 *nov3*. Assessing the intersection between these negatively correlated tumor suppressor  
418 genes and the predicted targets, we obtained a list of one gene for *hsa-miR-nov3* (*ATRX*)  
419 and three genes for *hsa-miR-nov7* (*APC*, *SFRP2* and *CDH11*), but the correlations were  
420 non-significant in all 4 cases (Table 4, Fig 7).

421 In order to get a broader overview of potential biological function, we selected the  
422 100 gene transcripts with the strongest positive and the top 100 gene transcripts with the  
423 strongest negative correlation to the two miRNAs (independent of previous target-  
424 predictions) and performed gene ontology analyses. We detected no cancer related  
425 pathways or cellular functions to be significantly associated with *hsa-miR-nov7* (Supporting  
426 Table S3). However, for *hsa-miR-nov3*, KEGG analysis of the negatively correlated genes  
427 revealed associations to Hepatorcellular carcinoma as well as several pathways related to  
428 drug metabolism (Supporting Table S4).

429

430

431

432 **Fig 6: Target genes predicted.** Venn-diagrams illustrating the number of target genes  
433 predicted by TargetScan, mirDB and Miranda for the two novel miRNAs *hsa-mir-nov3* (A)  
434 and *hsa-mir-nov7* (B).

435

436 **Fig 7: Correlations to tumor suppressor genes.** Scatter plots showing correlation of target  
437 tumor suppressors with A) *hsa-miR-nov3* and B) *hsa-miR-nov7*.

438

439 **Table 2: Top 10 GO and KEGG annotation.**

440

441 A) GO annotation - *hsa-miR-nov3*

442

| #  | Annotation                                               | ln(Bayes factor) | neg ln(p value) | FE: neg ln(p value) | FE: neg ln(FDR) |
|----|----------------------------------------------------------|------------------|-----------------|---------------------|-----------------|
| 1  | GO:0009653 [3]: morphogenesis                            | 94.88            | 7.98            | 100.5               | 92.91           |
| 2  | GO:0007275 [2]: development                              | 87.32            | 7.58            | 92.89               | 85.99           |
| 3  | GO:0007154 [3]: cell communication                       | 85.41            | 7.46            | 90.99               | 84.5            |
| 4  | GO:0009887 [4]: organogenesis                            | 74.65            | 6.99            | 80.24               | 74.26           |
| 5  | GO:0048513 [3]: organ development                        | 74.65            | 6.99            | 80.24               | 74.26           |
| 6  | GO:0007165 [4]: signal transduction                      | 74.2             | 6.97            | 79.77               | 73.97           |
| 7  | GO:0007242 [5]: intracellular signaling cascade          | 66.52            | 6.59            | 72.18               | 66.53           |
| 8  | GO:0007010 [6]: cytoskeleton organization and biogenesis | 55.54            | 6.04            | 61.15               | 55.63           |
| 9  | GO:0009790 [3]: embryonic development                    | 48.63            | 5.7             | 54.28               | 48.88           |
| 10 | GO:0006928 [4]: cell motility                            | 47.82            | 5.65            | 53.49               | 48.2            |

443

444

445 B) KEGG annotation - *hsa-miR-nov3*

446

447

| #  | Annotation                                                | Total Genes With Ann | ln(Bayes factor) | neg ln(p value) | FE: neg ln(p value) | FE: neg ln(FDR) |
|----|-----------------------------------------------------------|----------------------|------------------|-----------------|---------------------|-----------------|
| 1  | path:hsa04810: Regulation of actin cytoskeleton           | 35                   | 9.03             | 4.07            | 13.96               | 9.57            |
| 2  | path:hsa04010: MAPK signaling pathway                     | 36                   | 6.93             | 3.75            | 11.8                | 8.1             |
| 3  | path:hsa04510: Focal adhesion                             | 32                   | 4.15             | 3.26            | 8.94                | 5.94            |
| 4  | path:hsa04110: Cell cycle                                 | 18                   | 4.1              | 3.25            | 9.08                | 5.95            |
| 5  | path:hsa04060: Cytokine-cytokine receptor interaction     | 33                   | 3.23             | 3.07            | 7.97                | 5.24            |
| 6  | path:hsa04620: Toll-like receptor signaling pathway       | 17                   | 2.97             | 3.01            | 7.92                | 5.24            |
| 7  | path:hsa04210: Apoptosis                                  | 16                   | 2.13             | 2.82            | 7.06                | 4.55            |
| 8  | path:hsa04512: ECM-receptor interaction                   | 14                   | 1.17             | 2.55            | 6.09                | 3.72            |
| 9  | path:hsa04630: Jak-STAT signaling pathway                 | 21                   | 1.01             | 2.51            | 5.77                | 3.52            |
| 10 | path:hsa05050: Dentatorubropallidoluysian atrophy (DRPLA) | 5                    | 0.7              | 2.41            | 5.9                 | 3.59            |

448

449

450

451

452

453 C) GO annotation - *hsa-miR-nov7*

454

| #  | Annotation                                       | ln(Bayes factor) | neg ln(p value) | FE: ln(p value) | neg FE: ln(FDR) |
|----|--------------------------------------------------|------------------|-----------------|-----------------|-----------------|
| 1  | GO:0007154 [3]: cell communication               | 60.17            | 6.3             | 65.79           | 58.14           |
| 2  | GO:0007275 [2]: development                      | 54.83            | 6               | 60.38           | 53.43           |
| 3  | GO:0007165 [4]: signal transduction              | 50.84            | 5.81            | 56.44           | 49.89           |
| 4  | GO:0009653 [3]: morphogenesis                    | 48.96            | 5.72            | 54.56           | 48.3            |
| 5  | GO:0050794 [3]: regulation of cellular process   | 41.31            | 5.3             | 46.94           | 40.9            |
| 6  | GO:0009987 [2]: cellular process                 | 40.56            | 5.26            | 46.33           | 40.48           |
| 7  | GO:0009887 [4]: organogenesis                    | 40.37            | 5.25            | 45.94           | 40.24           |
| 8  | GO:0048513 [3]: organ development                | 39.98            | 5.23            | 45.54           | 40.09           |
| 9  | GO:0007242 [5]: intracellular signaling cascade  | 39.87            | 5.22            | 45.58           | 40.09           |
| 10 | GO:0050789 [2]: regulation of biological process | 39.18            | 5.18            | 44.62           | 39.27           |

455 D) KEGG annotation - *hsa-miR-nov3*

456

457

| #  | Annotation                                            | Total Genes With Ann | ln(Bayes factor) | neg ln(p value) | FE: ln(p value) | neg FE: ln(FDR) |
|----|-------------------------------------------------------|----------------------|------------------|-----------------|-----------------|-----------------|
| 1  | path:hsa04630: Jak-STAT signaling pathway             | 27                   | 5.53             | 3.5             | 10.48           | 6.6             |
| 2  | path:hsa04350: TGF-beta signaling pathway             | 18                   | 5.22             | 3.45            | 10.3            | 6.6             |
| 3  | path:hsa04010: MAPK signaling pathway                 | 33                   | 3.15             | 3.04            | 7.94            | 4.57            |
| 4  | path:hsa04210: Apoptosis                              | 17                   | 2.51             | 2.91            | 7.49            | 4.27            |
| 5  | path:hsa04620: Toll-like receptor signaling pathway   | 17                   | 2.28             | 2.85            | 7.25            | 4.24            |
| 6  | path:hsa04020: Calcium signaling pathway              | 4                    | 2.23             | 2.84            | 0               | 0               |
| 7  | path:hsa00471: D-Glutamine and D-glutamate metabolism | 3                    | 1.12             | 2.54            | 6.48            | 3.7             |
| 8  | path:hsa04510: Focal adhesion                         | 29                   | 0.96             | 2.49            | 5.64            | 3.23            |
| 9  | path:hsa05030: Amyotrophic lateral sclerosis (ALS)    | 5                    | -0.17            | 0               | 5.04            | 2.78            |
| 10 | path:hsa04512: ECM-receptor interaction               | 13                   | -0.28            | 0               | 4.61            | 2.39            |

458  
459  
460  
461  
462  
463  
464  
465  
466  
467  
468

469 **Table 3:** Spearman correlation table for *hsa-miR-nov3* and *hsa-miR-nov7* and their top 25 target  
470 genes (ranked by inverse correlation).

471

472 A) *hsa-miR-nov3*

473

| Gene Symbol | Estimate | P.value | Expression (mean) |
|-------------|----------|---------|-------------------|
| RMND5A      | -0.2018  | 0.0038  | 14.0750           |
| YES1        | -0.1649  | 0.0184  | 17.0218           |
| PALM2-AKAP2 | -0.1455  | 0.0378  | 13.0997           |
| SLC7A1      | -0.1224  | 0.0811  | 16.8650           |
| RAPGEF5     | -0.1208  | 0.0853  | 14.9652           |
| CTDSPL2     | -0.1196  | 0.0885  | 15.4945           |
| SLC4A5      | -0.1077  | 0.1251  | 15.0101           |
| HIPK1       | -0.1046  | 0.1366  | 13.3737           |
| ABHD12      | -0.0998  | 0.1555  | 16.2313           |
| FMNL2       | -0.0982  | 0.1624  | 16.0939           |
| POU4F1      | -0.0933  | 0.1844  | 13.4684           |
| RPS6KA3     | -0.0905  | 0.1981  | 14.6430           |
| LARP1       | -0.0890  | 0.2054  | 15.0210           |
| WIP12       | -0.0702  | 0.3184  | 14.7316           |
| MTCH1       | -0.0575  | 0.4139  | 18.6604           |
| DIAPH1      | -0.0528  | 0.4530  | 16.7109           |
| MARCKS      | -0.0481  | 0.4946  | 18.6286           |
| LUZP1       | -0.0453  | 0.5200  | 17.1097           |
| DNAJC8      | -0.0449  | 0.5238  | 18.2152           |
| CLOCK       | -0.0436  | 0.5354  | 15.7894           |
| SLAMF6      | -0.0415  | 0.5557  | 15.4277           |
| CDAN1       | -0.0405  | 0.5655  | 16.6394           |
| PCDH11X     | -0.0359  | 0.6104  | 13.4661           |
| RYBP        | -0.0346  | 0.6234  | 16.9184           |
| FGF1        | -0.0344  | 0.6249  | 13.9423           |

474

475

476

477

478

479

480

481

482

483

484

485

486

487

488

489

490

491  
492

B) *hsa-miR-nov7*

| Gene Symbol | Estimate | P.value | Expression (Mean) |
|-------------|----------|---------|-------------------|
| GLUD1       | -0.2274  | 0.0011  | 18.0399           |
| SASH1       | -0.2095  | 0.0026  | 16.9164           |
| MARK1       | -0.1883  | 0.0070  | 15.0356           |
| ARID5B      | -0.1877  | 0.0072  | 17.7569           |
| ELOVL5      | -0.1854  | 0.0079  | 17.5656           |
| PUM1        | -0.1707  | 0.0147  | 17.8295           |
| PNRC2       | -0.1599  | 0.0224  | 15.4674           |
| UNC13B      | -0.1583  | 0.0238  | 15.5633           |
| FLRT2       | -0.1581  | 0.0239  | 15.7323           |
| ZFHX4       | -0.1482  | 0.0344  | 14.7383           |
| CHIC1       | -0.1479  | 0.0348  | 13.5807           |
| MAN1A1      | -0.1457  | 0.0375  | 15.4956           |
| CPEB2       | -0.1387  | 0.0478  | 14.6995           |
| PDE4D       | -0.1377  | 0.0495  | 13.9823           |
| TMED7       | -0.1366  | 0.0514  | 17.1083           |
| NDFIP1      | -0.1280  | 0.0680  | 16.1458           |
| CSMD1       | -0.1269  | 0.0704  | 13.8158           |
| MITF        | -0.1187  | 0.0908  | 14.0482           |
| ITSN1       | -0.1185  | 0.0915  | 14.8011           |
| CTDSPL2     | -0.1178  | 0.0932  | 15.4945           |
| ATAD2B      | -0.1178  | 0.0932  | 14.9892           |
| SFRP2       | -0.1129  | 0.1080  | 18.4511           |
| DPP10       | -0.1119  | 0.1110  | 13.4306           |
| BMPR2       | -0.1107  | 0.1149  | 17.1664           |
| EIF5A2      | -0.1100  | 0.1174  | 14.5450           |

493  
494  
495

496 **Table 4:** List of intersection between correlated tumour suppressor genes and the predicted  
497 targets of *hsa-miR-nov3* and *hsa-miR-nov7*.

498

| <i>hsa-miR-nov3</i> | <i>hsa-miR-nov7</i> |
|---------------------|---------------------|
| ATRX                | APC                 |
|                     | CDH11               |
|                     | SFRP2               |

499

500

501

502

503

504

505 **Expression of *hsa-miR-nov7* and *hsa-miR-nov3* and clinical outcome in breast cancer**

506

507 Since both *hsa-miR-nov7* and *hsa-miR-nov3* were overexpressed in the tumor tissue of  
508 breast cancer patients, we assessed whether any of the two novel miRNAs were associated  
509 to clinical outcomes in study 1 (223 breast cancer patients). Given that these patients were  
510 enrolled in a prospective study specifically designed to assess response to primary  
511 chemotherapy administered as epirubicin or paclitaxel monotherapy in a neoadjuvant setting  
512 [26, 48], we assessed the association of *hsa-miR-nov7* and *hsa-miR-nov3* levels with primary  
513 therapy response and with long term survival (10-years).

514 We found no association between any of the two novel miRNAs and primary  
515 response to either epirubicin or paclitaxel (data not shown). Regarding survival, we observed  
516 a weak association between high levels of *hsa-miR-nov7* and poor survival in the paclitaxel  
517 treated arm of the study, with the strongest associations observed for relapse free survival,  
518 however, none of these associations reached statistical significance (Fig 8). No effect was  
519 observed in the epirubicin treated arm. Further, for *hsa-miR-nov3*, no significant correlation  
520 to outcome was recorded.

521 Given the skewed expression levels between breast cancer subtypes for *hsa-miR-*  
522 *nov3*, we performed survival analyses stratified for ER-status and subtypes. These analyses  
523 revealed no significant associations to survival (data not shown).

524

525

526 **Fig 8: miRNAs and breast cancer survival.** Kaplan-Meier curves showing (i) disease-  
527 specific and (ii) relapse-free survival of locally advanced breast cancer patients treated with  
528 epirubicin or paclitaxel monotherapy in the neoadjuvant setting (study 1), with respect to  
529 expression levels of (A) *hsa-miR-nov3* and (B) *hsa-miR-nov7* on all samples.

530

531

532

533

## 534 Discussion

535

536 We investigated whether we could detect novel, previously undescribed miRNAs and, if so,  
537 address their potential association to other defined biological parameters and to outcome in a  
538 cohort of locally advanced breast cancer. We successfully predicted 10 new miRNAs, out of

539 which 2 were deemed reliable because of their detected presence in more than one patient.  
540 Although these two novel miRNAs (preliminary termed *hsa-miR-nov7* and *hsa-miR-nov3*)  
541 were only predicted from 8 samples among the 50 initially sequenced biopsies, we found  
542 them to be expressed in all patients by highly sensitive qPCR at varying levels. In addition to  
543 our *in vitro* validations, the qPCR detection validated the initial NGS based analysis,  
544 detecting these two miRNAs.

545 Since expression of the two miRNAs was confirmed in breast tumor tissue from the  
546 majority of patients analyzed, we went on to assess the relative expression levels in tumor  
547 versus matched normal breast tissue, collected from a non-tumor bearing quadrant. Our  
548 finding that both novel miRNAs had higher expression levels in tumor than in normal tissue  
549 indicates a potential functional role in breast cancer. However, although being  
550 overexpressed, the biological role of these two miRNAs in cancer should be interpreted with  
551 caution. The expression levels are very low, and it is therefore uncertain whether they will  
552 have a major impact on cellular functions. However, when assessing the potential functional  
553 roles of these microRNAs by *in silico* prediction of targets followed by validation using  
554 correlation to mRNA-array data, the KEGG and GO annotations for these targets revealed  
555 cellular functions of potential importance in development and progression of cancer. As such,  
556 our present findings may warrant further investigations into the functions of the two miRNAs.  
557 Notably, regarding *hsa-miR-nov3*, it was of particular interest that this miRNA was  
558 significantly higher expressed in ER-positive as compared to ER-negative breast cancers.  
559 Accordingly, we found relatively high expression levels of *hsa-miR-nov3* in tumors of the  
560 luminal and normal-like subtypes, contrasting low expression levels in basal-like and her2-  
561 like tumors [49, 50]. This finding may indicate a potential role for *hsa-miR-nov3* restricted to  
562 ER-positive tumors.

563 Regarding potential specific targets, we narrowed these down by first assessing the  
564 intersect of three different target prediction algorithms, and then the intersect of this result  
565 with a predefined list of tumor suppressors. Although none of the remaining genes after this  
566 filtering had a statistically significant inverse correlation with the miRNAs, we identified some  
567 potentially interesting connections: For *hsa-miR-nov3*, we propose *ATRAX* as a target. This is  
568 a gene in the SWI/SNF family, involved in chromatin remodelling, and it has previously been  
569 found subject to loss of heterozygosity (LOH) in breast cancer [51]. Importantly, we recently  
570 reported mutations in the SWI/SNF family genes to be enriched in relapsed breast cancer as  
571 compared to primary cancers [52]. Thus, this supports the hypothesis of a breast cancer  
572 promoting function for *hsa-miR-nov3*. For *hsa-miR-nov7*, we propose *APC*, *SFRP2*, and  
573 *CDH11* as potential targets. Interestingly, the two former are involved in regulation of the  
574 Wnt-signalling pathway [53-55] and both have previously been reported as targets for several  
575 miRNAs in breast cancer [56-58]. Taken together, this may imply a role for *hsa-miR-nov7* in  
576 Wnt signaling. Notably, during our work with the present project, *hsa-miR-nov7*, was  
577 identified by Lim and colleagues and coined miR-10393-3p [46]. They found this miRNA to  
578 target genes involved in chromatin modifications associated with pathogenesis of Diffuse  
579 large B-cell lymphoma (DLBCL). While this differs from our present finding, it may likely be  
580 explained by tissue specific effects of the miRNA.

581 Regarding any predictive or prognostic role for the two investigated miRNAs, we  
582 found no significant impact on survival. While we recorded a non-significant trend towards an  
583 association between miRnov7 expression and overall survival in the paclitaxel arm, further  
584 studies on larger patient cohorts are warranted to clarify this issue. Alternatively, the miRNAs  
585 could play a role in tumorigenesis but not later tumor progression. As such, the observed



586 overexpression in tumor tissue compared to normal breast tissue may be a remaining signal  
587 from tumorigenesis.

588 Whether cancer related overexpression of the two miRNAs described here is merely  
589 consequences of other molecular mechanisms in cancer cells or whether the two miRNAs  
590 may be involved in tumorigenesis, but not subsequent cancer progression, remains  
591 unknown.

592

593

## 594 **Acknowledgements**

595 We thank Beryl Leirvaag and Gjertrud T. Iversen for technical assistance.

596

597

## 598 **Funding**

599 This work was performed in the Mohn Cancer Research Laboratory. The project was funded  
600 by grants from the Trond Mohn Research Foundation, The Norwegian Cancer Society, The  
601 Norwegian Research Council and the Norwegian Health Region West.

602

603

## 604 **Conflict of interest**

605 The authors declare no conflict of interest.

606

607

## 608 **References**

609

610

- 611 1. Beezhold KJ, Castranova V, Chen F. Microprocessor of microRNAs: regulation and  
612 potential for therapeutic intervention. *Mol Cancer*. 2010;9:134. Epub 2010/06/03. doi:  
613 10.1186/1476-4598-9-134. PubMed PMID: 20515486; PubMed Central PMCID:  
614 PMCPMC2887798.
- 615 2. Lee RC, Feinbaum RL, Ambros V. The *C. elegans* heterochronic gene *lin-4* encodes small  
616 RNAs with antisense complementarity to *lin-14*. *Cell*. 1993;75(5):843-54. Epub 1993/12/03.  
617 PubMed PMID: 8252621.
- 618 3. Lee Y, Jeon K, Lee JT, Kim S, Kim VN. MicroRNA maturation: stepwise processing and  
619 subcellular localization. *The EMBO journal*. 2002;21(17):4663-70. Epub 2002/08/29. PubMed  
620 PMID: 12198168; PubMed Central PMCID: PMCPMC126204.
- 621 4. Reinhart BJ, Slack FJ, Basson M, Pasquinelli AE, Bettinger JC, Rougvie AE, et al. The 21-  
622 nucleotide *let-7* RNA regulates developmental timing in *Caenorhabditis elegans*. *Nature*.  
623 2000;403(6772):901-6. Epub 2000/03/08. doi: 10.1038/35002607. PubMed PMID: 10706289.
- 624 5. Lagos-Quintana M, Rauhut R, Lendeckel W, Tuschl T. Identification of novel genes coding  
625 for small expressed RNAs. *Science (New York, NY)*. 2001;294(5543):853-8. Epub 2001/10/27.  
626 doi: 10.1126/science.1064921. PubMed PMID: 11679670.
- 627 6. Ambros V, Bartel B, Bartel DP, Burge CB, Carrington JC, Chen X, et al. A uniform system  
628 for microRNA annotation. *RNA (New York, NY)*. 2003;9(3):277-9. Epub 2003/02/20. PubMed  
629 PMID: 12592000; PubMed Central PMCID: PMCPMC1370393.
- 630 7. Ambros V, Lee RC, Lavanway A, Williams PT, Jewell D. MicroRNAs and other tiny  
631 endogenous RNAs in *C. elegans*. *Current biology : CB*. 2003;13(10):807-18. Epub 2003/05/16.  
632 PubMed PMID: 12747828.
- 633 8. Aravin AA, Lagos-Quintana M, Yalcin A, Zavolan M, Marks D, Snyder B, et al. The small  
634 RNA profile during *Drosophila melanogaster* development. *Developmental cell*. 2003;5(2):337-  
635 50. Epub 2003/08/16. PubMed PMID: 12919683.

- 636 9. Mishra S, Yadav T, Rani V. Exploring miRNA based approaches in cancer diagnostics and  
637 therapeutics. *Critical reviews in oncology/hematology*. 2016;98:12-23. Epub 2015/10/21. doi:  
638 10.1016/j.critrevonc.2015.10.003. PubMed PMID: 26481951.
- 639 10. Friedlander MR, Chen W, Adamidi C, Maaskola J, Einspanier R, Knespel S, et al.  
640 Discovering microRNAs from deep sequencing data using miRDeep. *Nat Biotechnol*.  
641 2008;26(4):407-15. Epub 2008/04/09. doi: 10.1038/nbt1394. PubMed PMID: 18392026.
- 642 11. Kozomara A, Griffiths-Jones S. miRBase: annotating high confidence microRNAs using  
643 deep sequencing data. *Nucleic Acids Res*. 2014;42(Database issue):D68-73. Epub 2013/11/28.  
644 doi: 10.1093/nar/gkt1181. PubMed PMID: 24275495; PubMed Central PMCID:  
645 PMC3965103.
- 646 12. Wang Y, Yu Y, Tsuyada A, Ren X, Wu X, Stubblefield K, et al. Transforming growth factor-  
647 beta regulates the sphere-initiating stem cell-like feature in breast cancer through miRNA-181  
648 and ATM. *Oncogene*. 2011;30(12):1470-80. Epub 2010/11/26. doi: 10.1038/onc.2010.531.  
649 PubMed PMID: 21102523; PubMed Central PMCID: PMC3063856.
- 650 13. Lonning PE, Knappskog S, Staalesen V, Chrisanthar R, Lillehaug JR. Breast cancer  
651 prognostication and prediction in the postgenomic era. *Ann Oncol*. 2007;18(8):1293-306. Epub  
652 2007/02/24. doi: mdm013 [pii]  
653 10.1093/annonc/mdm013. PubMed PMID: 17317675.
- 654 14. Lonning PE, Knappskog S. Mapping genetic alterations causing chemoresistance in  
655 cancer: identifying the roads by tracking the drivers. *Oncogene*. 2013;32:5315 - 30. doi:  
656 10.1038/onc.2013.48. PubMed PMID: 23474753.
- 657 15. Gotte M, Mohr C, Koo CY, Stock C, Vaske AK, Viola M, et al. miR-145-dependent targeting  
658 of junctional adhesion molecule A and modulation of fascin expression are associated with  
659 reduced breast cancer cell motility and invasiveness. *Oncogene*. 2010;29(50):6569-80. Epub  
660 2010/09/08. doi: 10.1038/onc.2010.386. PubMed PMID: 20818426.
- 661 16. Rask L, Balslev E, Jorgensen S, Eriksen J, Flyger H, Moller S, et al. High expression of miR-  
662 21 in tumor stroma correlates with increased cancer cell proliferation in human breast cancer.  
663 *APMIS : acta pathologica, microbiologica, et immunologica Scandinavica*. 2011;119(10):663-73.  
664 Epub 2011/09/16. doi: 10.1111/j.1600-0463.2011.02782.x. PubMed PMID: 21917003.
- 665 17. Harquail J, Benzina S, Robichaud GA. MicroRNAs and breast cancer malignancy: an  
666 overview of miRNA-regulated cancer processes leading to metastasis. *Cancer biomarkers :*  
667 *section A of Disease markers*. 2012;11(6):269-80. Epub 2012/12/19. doi: 10.3233/cbm-120291.  
668 PubMed PMID: 23248185.
- 669 18. Iorio MV, Ferracin M, Liu CG, Veronese A, Spizzo R, Sabbioni S, et al. MicroRNA gene  
670 expression deregulation in human breast cancer. *Cancer Res*. 2005;65(16):7065-70. Epub  
671 2005/08/17. doi: 10.1158/0008-5472.Can-05-1783. PubMed PMID: 16103053.
- 672 19. Nassar FJ, Nasr R, Talhouk R. MicroRNAs as biomarkers for early breast cancer diagnosis,  
673 prognosis and therapy prediction. *Pharmacology & Therapeutics*. 2017;172:34-49. doi:  
674 <https://doi.org/10.1016/j.pharmthera.2016.11.012>.
- 675 20. Goh JN, Loo SY, Datta A, Siveen KS, Yap WN, Cai W, et al. microRNAs in breast cancer:  
676 regulatory roles governing the hallmarks of cancer. *Biological Reviews*. 2016;91(2):409-28. doi:  
677 doi:10.1111/brv.12176.
- 678 21. Volinia S, Galasso M, Sana ME, Wise TF, Palatini J, Huebner K, et al. Breast cancer  
679 signatures for invasiveness and prognosis defined by deep sequencing of microRNA. *Proc Natl*  
680 *Acad Sci U S A*. 2012;109(8):3024-9. doi: 10.1073/pnas.1200010109. PubMed PMID: 22315424;  
681 PubMed Central PMCID: PMC3286983.
- 682 22. Yan LX, Huang XF, Shao Q, Huang MAY, Deng L, Wu QL, et al. MicroRNA miR-21  
683 overexpression in human breast cancer is associated with advanced clinical stage, lymph node  
684 metastasis and patient poor prognosis. *RNA (New York, NY)*. 2008;14(11):2348-60. doi:  
685 10.1261/rna.1034808. PubMed PMID: 18812439; PubMed Central PMCID: PMC32578865.
- 686 23. Wu JZ, Yang TJ, Lu P, Ma W. Analysis of signaling pathways in recurrent breast cancer.  
687 *Genetics and Molecular Research*. 2014;13(4):10097-104. doi: 10.4238/2014.December.4.4.  
688 PubMed PMID: WOS:000350229200042.

- 689 24. Tashkandi H, Shah N, Patel Y, Chen H. Identification of new miRNA biomarkers  
690 associated with HER2-positive breast cancers. *Oncoscience*. 2015;2(11):924-9. Epub  
691 2015/12/24. PubMed PMID: 26697527; PubMed Central PMCID: PMC4675790.
- 692 25. Güllü G. Clinical significance of miR-140-5p and miR-193b expression in patients.  
693 2015;38(1):21-9. doi: 10.1590/s1415-475738120140167. PubMed PMID: 25983620; PubMed  
694 Central PMCID: PMC4415571.
- 695 26. Chrisanthar R, Knappskog S, Lokkevik E, Anker G, Ostenstad B, Lundgren S, et al. CHEK2  
696 mutations affecting kinase activity together with mutations in TP53 indicate a functional  
697 pathway associated with resistance to epirubicin in primary breast cancer. *PLoS ONE*.  
698 2008;3(8):e3062. Epub 2008/08/30. doi: 10.1371/journal.pone.0003062. PubMed PMID:  
699 18725978.
- 700 27. Lonning PE, Helle H, Duong NK, Ekse D, Aas T, Geisler J. Tissue estradiol is selectively  
701 elevated in receptor positive breast cancers while tumour estrone is reduced independent of  
702 receptor status. *J Steroid Biochem Mol Biol*. 2009;117(1-3):31-41. Epub 2009/07/14. doi:  
703 10.1016/j.jsbmb.2009.06.005. PubMed PMID: 19591931.
- 704 28. Sasidharan V, Lu YC, Bansal D, Dasari P, Poduval D, Seshasayee A, et al. Identification of  
705 neoblast- and regeneration-specific miRNAs in the planarian *Schmidtea mediterranea*. *RNA*  
706 (New York, NY). 2013;19(10):1394-404. Epub 2013/08/27. doi: 10.1261/rna.038653.113.  
707 PubMed PMID: 23974438; PubMed Central PMCID: PMC3854530.
- 708 29. Krishna S, Nair A, Cheedipudi S, Poduval D, Dhawan J, Palakodeti D, et al. Deep  
709 sequencing reveals unique small RNA repertoire that is regulated during head regeneration in  
710 *Hydra magnipapillata*. *Nucleic Acids Res*. 2013;41(1):599-616. Epub 2012/11/21. doi:  
711 10.1093/nar/gks1020. PubMed PMID: 23166307; PubMed Central PMCID: PMC3592418.
- 712 30. Knappskog S, Chrisanthar R, Lokkevik E, Anker G, Ostenstad B, Lundgren S, et al. Low  
713 expression levels of ATM may substitute for CHEK2 /TP53 mutations predicting resistance  
714 towards anthracycline and mitomycin chemotherapy in breast cancer. *Breast Cancer Res*.  
715 2012;14(2):R47. doi: 10.1186/bcr3147. PubMed PMID: 22420423; PubMed Central PMCID:  
716 PMC3446381.
- 717 31. Enright AJ, John B, Gaul U, Tuschl T, Sander C, Marks DS. MicroRNA targets in *Drosophila*.  
718 *Genome biology*. 2003;5(1):R1. Epub 2004/01/08. doi: 10.1186/gb-2003-5-1-r1. PubMed PMID:  
719 14709173; PubMed Central PMCID: PMC395733.
- 720 32. John B, Enright AJ, Aravin A, Tuschl T, Sander C, Marks DS. Human MicroRNA targets.  
721 *PLoS biology*. 2004;2(11):e363. Epub 2004/10/27. doi: 10.1371/journal.pbio.0020363. PubMed  
722 PMID: 15502875; PubMed Central PMCID: PMC395733.
- 723 33. Wong N, Wang X. miRDB: an online resource for microRNA target prediction and  
724 functional annotations. *Nucleic Acids Res*. 2015;43(Database issue):D146-52. Epub 2014/11/08.  
725 doi: 10.1093/nar/gku1104. PubMed PMID: 25378301; PubMed Central PMCID:  
726 PMC395733.
- 727 34. Lewis BP, Burge CB, Bartel DP. Conserved seed pairing, often flanked by adenosines,  
728 indicates that thousands of human genes are microRNA targets. *Cell*. 2005;120(1):15-20. Epub  
729 2005/01/18. doi: 10.1016/j.cell.2004.12.035. PubMed PMID: 15652477.
- 730 35. Smith TF, Waterman MS. Identification of common molecular subsequences. *J Mol Biol*.  
731 1981;147(1):195-7. Epub 1981/03/25. PubMed PMID: 7265238.
- 732 36. Wuchty S, Fontana W, Hofacker IL, Schuster P. Complete suboptimal folding of RNA and  
733 the stability of secondary structures. *Biopolymers*. 1999;49(2):145-65. Epub 1999/03/10. doi:  
734 10.1002/(sici)1097-0282(199902)49:2<145::aid-bip4>3.0.co;2-g. PubMed PMID: 10070264.
- 735 37. Wang X, El Naqa IM. Prediction of both conserved and nonconserved microRNA targets  
736 in animals. *Bioinformatics*. 2008;24(3):325-32. Epub 2007/12/01. doi:  
737 10.1093/bioinformatics/btm595. PubMed PMID: 18048393.
- 738 38. Friedman RC, Farh KK, Burge CB, Bartel DP. Most mammalian mRNAs are conserved  
739 targets of microRNAs. *Genome Res*. 2009;19(1):92-105. Epub 2008/10/29. doi:  
740 10.1101/gr.082701.108. PubMed PMID: 18955434; PubMed Central PMCID: PMC2612969.
- 741 39. Grimson A, Farh KK, Johnston WK, Garrett-Engele P, Lim LP, Bartel DP. MicroRNA  
742 targeting specificity in mammals: determinants beyond seed pairing. *Molecular cell*.

- 743 2007;27(1):91-105. Epub 2007/07/07. doi: 10.1016/j.molcel.2007.06.017. PubMed PMID:  
744 17612493; PubMed Central PMCID: PMCPMC3800283.
- 745 40. Yates LR, Gerstung M, Knappskog S, Desmedt C, Gundem G, Van Loo P, et al. Subclonal  
746 diversification of primary breast cancer revealed by multiregion sequencing. *Nat Med*.  
747 2015;21(7):751-9. doi: 10.1038/nm.3886. PubMed PMID: 26099045; PubMed Central PMCID:  
748 PMC4500826.
- 749 41. Chang JT, Nevins JR. GATHER: a systems approach to interpreting genomic signatures.  
750 *Bioinformatics*. 2006;22(23):2926-33. Epub 2006/09/27. doi: 10.1093/bioinformatics/btl483.  
751 PubMed PMID: 17000751.
- 752 42. Kanehisa M, Goto S. KEGG: kyoto encyclopedia of genes and genomes. *Nucleic Acids Res*.  
753 2000;28(1):27-30. Epub 1999/12/11. PubMed PMID: 10592173; PubMed Central PMCID:  
754 PMCPMC102409.
- 755 43. Curtis C. The genomic and transcriptomic architecture of 2,000 breast tumours reveals  
756 novel subgroups. *486(7403):346-52*. doi: 10.1038/nature10983. PubMed PMID: 22522925;  
757 PubMed Central PMCID: PMCPMC3440846.
- 758 44. Ritchie ME, Phipson B, Wu D, Hu Y, Law CW, Shi W, et al. limma powers differential  
759 expression analyses for RNA-sequencing and microarray studies. *Nucleic Acids Res*.  
760 2015;43(7):e47. Epub 2015/01/22. doi: 10.1093/nar/gkv007. PubMed PMID: 25605792;  
761 PubMed Central PMCID: PMCPMC4402510.
- 762 45. Barbosa-Morais NL, Dunning MJ, Samarajiwa SA, Darot JF, Ritchie ME, Lynch AG, et al. A  
763 re-annotation pipeline for Illumina BeadArrays: improving the interpretation of gene expression  
764 data. *Nucleic Acids Res*. 2010;38(3):e17. Epub 2009/11/20. doi: 10.1093/nar/gkp942. PubMed  
765 PMID: 19923232; PubMed Central PMCID: PMCPMC2817484.
- 766 46. Lim EL, Trinh DL, Scott DW, Chu A, Krzywinski M, Zhao Y, et al. Comprehensive miRNA  
767 sequence analysis reveals survival differences in diffuse large B-cell lymphoma patients. *Genome*  
768 *biology*. 2015;16:18. Epub 2015/02/28. doi: 10.1186/s13059-014-0568-y. PubMed PMID:  
769 25723320; PubMed Central PMCID: PMCPMC4308918.
- 770 47. Perou CM, Sorlie T, Eisen MB, van de Rijn M, Jeffrey SS, Rees CA, et al. Molecular portraits  
771 of human breast tumours. *Nature*. 2000;406(6797):747-52. doi:  
772 [http://www.nature.com/nature/journal/v406/n6797/supplinfo/406747a0\\_S1.html](http://www.nature.com/nature/journal/v406/n6797/supplinfo/406747a0_S1.html).
- 773 48. Chrisanthar R, Knappskog S, Iokkevik E, Anker G, Ostenstad B, Lundgren S, et al.  
774 Predictive and prognostic impact of TP53 mutations and MDM2 promoter genotype in primary  
775 breast cancer patients treated with epirubicin or paclitaxel. *PLoS ONE*. 2011;6(4):e19249. doi:  
776 doi:10.1371/journal.pone.0019249.
- 777 49. Perou CM, Sorlie T, Eisen MB, van de Rijn M, Jeffrey SS, Rees CA, et al. Molecular portraits  
778 of human breast tumours. *Nature*. 2000;406(6797):747-52. doi: 10.1038/35021093. PubMed  
779 PMID: 10963602.
- 780 50. Sorlie T, Perou CM, Tibshirani R, Aas T, Geisler S, Johnsen H, et al. Gene expression  
781 patterns of breast carcinomas distinguish tumor subclasses with clinical implications. *Proc Natl*  
782 *Acad Sci U S A*. 2001;98(19):10869-74. doi: 10.1073/pnas.191367098. PubMed PMID:  
783 11553815; PubMed Central PMCID: PMC58566.
- 784 51. Roy D, Guida P, Zhou G, Echiburu-Chau C, Calaf GM. Gene expression profiling of breast  
785 cells induced by X-rays and heavy ions. *International journal of molecular medicine*.  
786 2008;21(5):627-36. Epub 2008/04/22. PubMed PMID: 18425356.
- 787 52. Yates LR, Knappskog S, Wedge D, Farmery JHR, Gonzalez S, Martincorena I, et al. Genomic  
788 Evolution of Breast Cancer Metastasis and Relapse. *Cancer Cell*. 2017;32(2):169-84.e7. doi:  
789 10.1016/j.ccell.2017.07.005. PubMed PMID: 28810143; PubMed Central PMCID:  
790 PMCPMC5559645.
- 791 53. von Marschall Z, Fisher LW. Secreted Frizzled-Related Protein-2 (sFRP2) Augments  
792 Canonical Wnt3a-induced Signaling. *Biochem Biophys Res Commun*. 2010;400(3):299-304. doi:  
793 10.1016/j.bbrc.2010.08.043. PubMed PMID: 20723538; PubMed Central PMCID:  
794 PMCPMC2952323.
- 795 54. Rattner A, Hsieh JC, Smallwood PM, Gilbert DJ, Copeland NG, Jenkins NA, et al. A family of  
796 secreted proteins contains homology to the cysteine-rich ligand-binding domain of

797 frizzled receptors. Proc Natl Acad Sci U S A. 1997;94(7):2859-63. PubMed PMID: 9096311;  
798 PubMed Central PMCID: PMCPMC20287.  
799 55. Hankey W, Frankel WL, Groden J. Functions of the APC tumor suppressor protein  
800 dependent and independent of canonical WNT signaling: Implications for therapeutic targeting.  
801 Cancer metastasis reviews. 2018;37(1):159-72. doi: 10.1007/s10555-017-9725-6. PubMed  
802 PMID: PMC5803335.  
803 56. Isobe T, Hisamori S, Hogan DJ, Zabala M, Hendrickson DG, Dalerba P, et al. miR-142  
804 regulates the tumorigenicity of human breast cancer stem cells through the canonical WNT  
805 signaling pathway. eLife. 2014;3. Epub 2014/11/19. doi: 10.7554/eLife.01977. PubMed PMID:  
806 25406066; PubMed Central PMCID: PMCPMC4235011.  
807 57. Tan Z, Zheng H, Liu X, Zhang W, Zhu J, Wu G, et al. MicroRNA-1229 overexpression  
808 promotes cell proliferation and tumorigenicity and activates Wnt/beta-catenin signaling in  
809 breast cancer. Oncotarget. 2016;7(17):24076-87. Epub 2016/03/19. doi:  
810 10.18632/oncotarget.8119. PubMed PMID: 26992223; PubMed Central PMCID:  
811 PMCPMC5029685.  
812 58. Liu S, Wang Z, Liu Z, Shi S, Zhang Z, Zhang J, et al. miR-221/222 activate the Wnt/ $\beta$ -  
813 catenin signaling to promote triple negative breast cancer. Journal of Molecular Cell Biology.  
814 2018:mjy041-mjy. doi: 10.1093/jmcb/mjy041.  
815  
816  
817

## 818 Supporting information

819  
820 **S1 Fig. Predicted novel miRNAs.** Table on the upper left shows miRDeep2 scores and  
821 read counts. RNA secondary structure for miRNA on the top right. Color code for depiction  
822 as follows mature sequence in red, loop sequence in yellow and purple for star sequences.  
823 Density plot in the middle shows distribution of reads in precursor reads predicted. Dotted  
824 lines illustrate alignment and mm, number of mismatches. Exp, is potential precursor model  
825 predicted by algorithm with taking accounts of stability based on free energy, position and  
826 read frequencies according to Dicer/Drosha processing of miRNA. Obs, is position and reads  
827 found from deep sequencing data. (A) *hsa-miR-nov3* and (B) *hsa-miR-nov7*.  
828

829 **S1 Table. In-house pan-cancer panel of 283 tumor suppressor genes.** Panel generated  
830 based on CGPv2/3-panels [40], Roche's Comprehensive Cancer Design along with manual  
831 literature search, to filter target genes of interest.

832  
833 **S2 Table. Correlation miRNAs and tumour suppressor genes.** Spearman correlation  
834 table for *hsa-miR-nov3* (A) and *hsa-miR-nov7* (B) inversely correlated tumor suppressor  
835 genes.

836  
837 **S3 Table. Correlations mir7 and gene ontology.**

838  
839 **S4 Table. Correlations mir3 and gene ontology.**

840  
841 **S1 File. Supporting information mirDeep.**

842

Figure 1  
 A. *hsa-miR-nov3*  
 (i)

Mature
Star

5'- aaaaugucuggauuuccacuaaagcaggauucagacuaaaauaaagcugcuaagugcuguguuugcguccccugcuaaaaaaaguguuucuaaacuaaccugucug -3' obs  
 (ii) aaaaugucuggauuuccacuaaagcaggauucagacuaaaauaaagcugcuaagugcuguguuugcguccccugcuaaaaaaaguguuucuaaacuaaccugucug exp

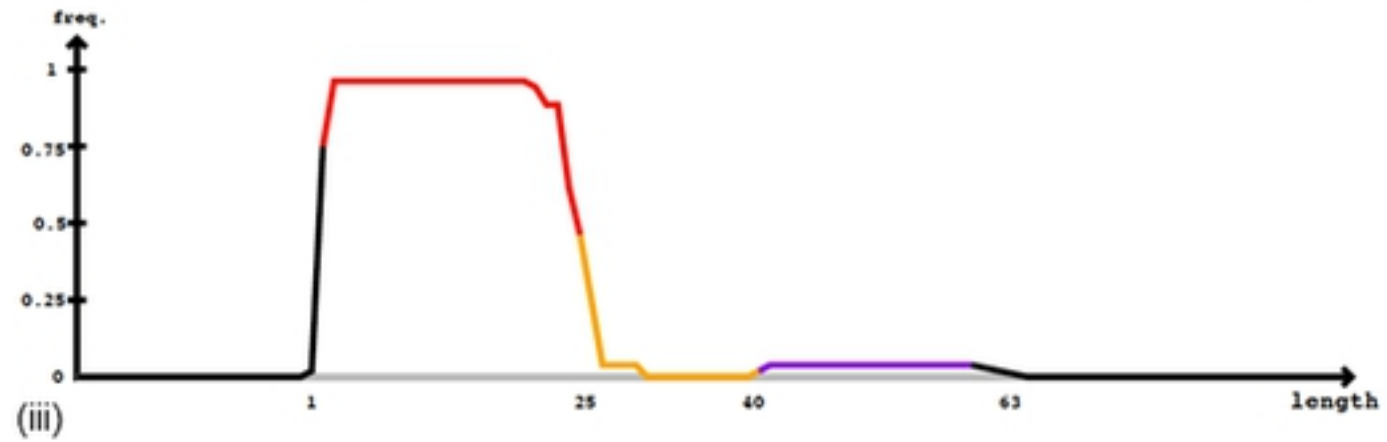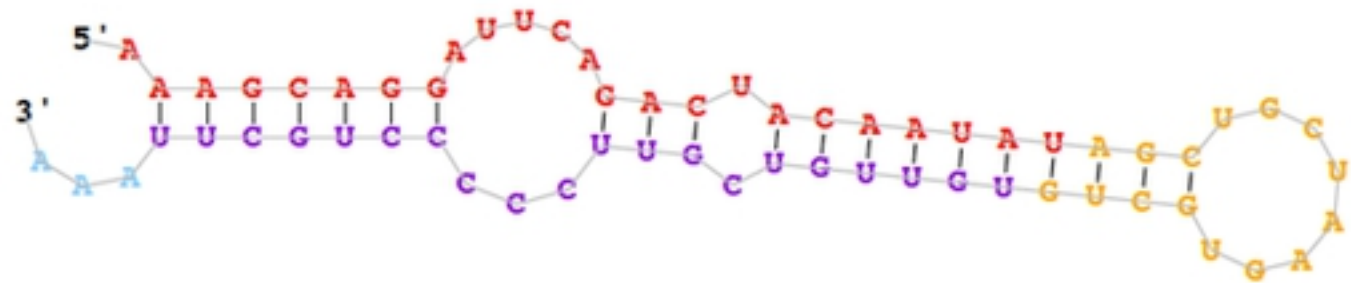

B. *hsa-miR-nov7*

(i)

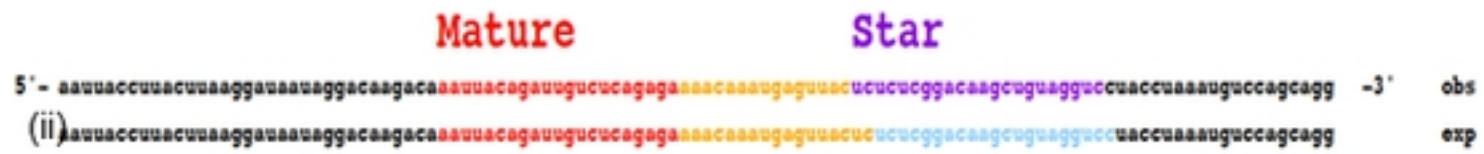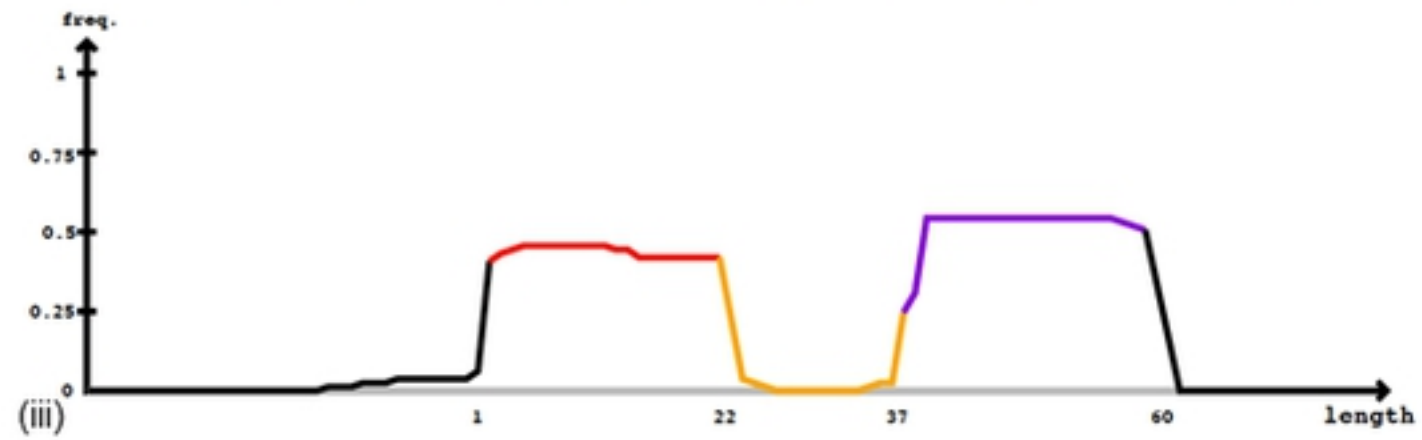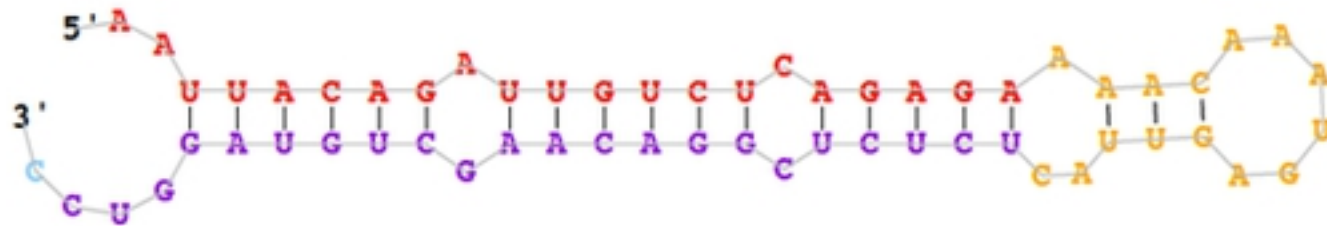

Figure

Figure 2

A)

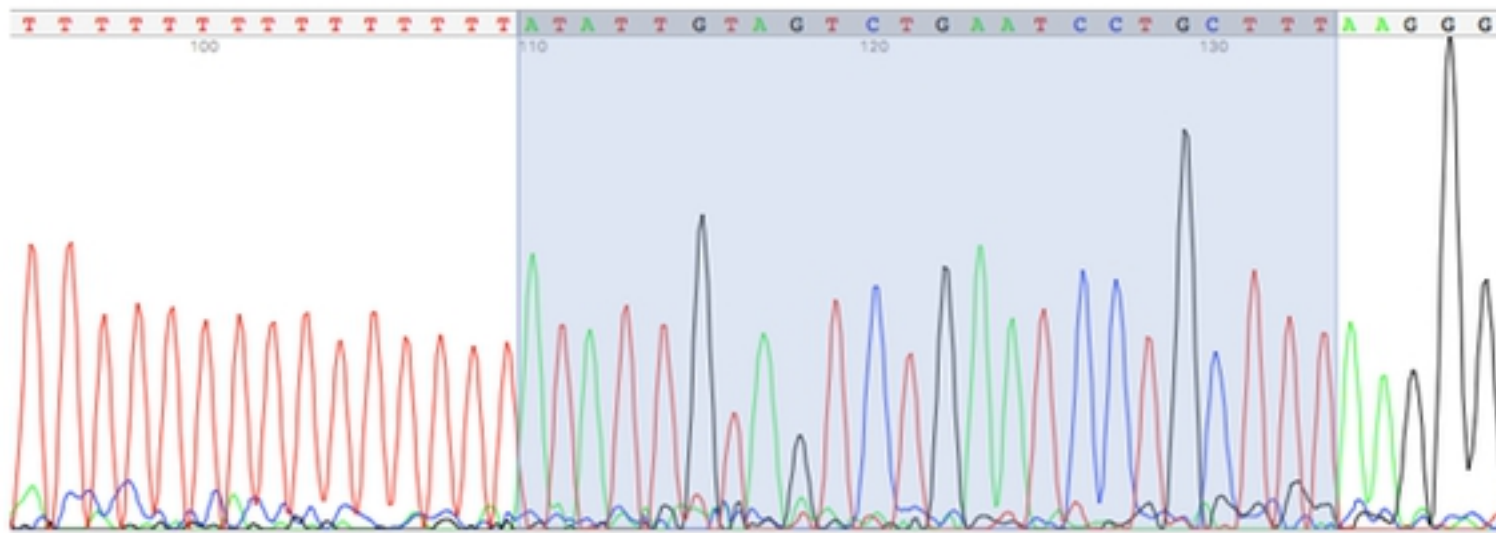

B)

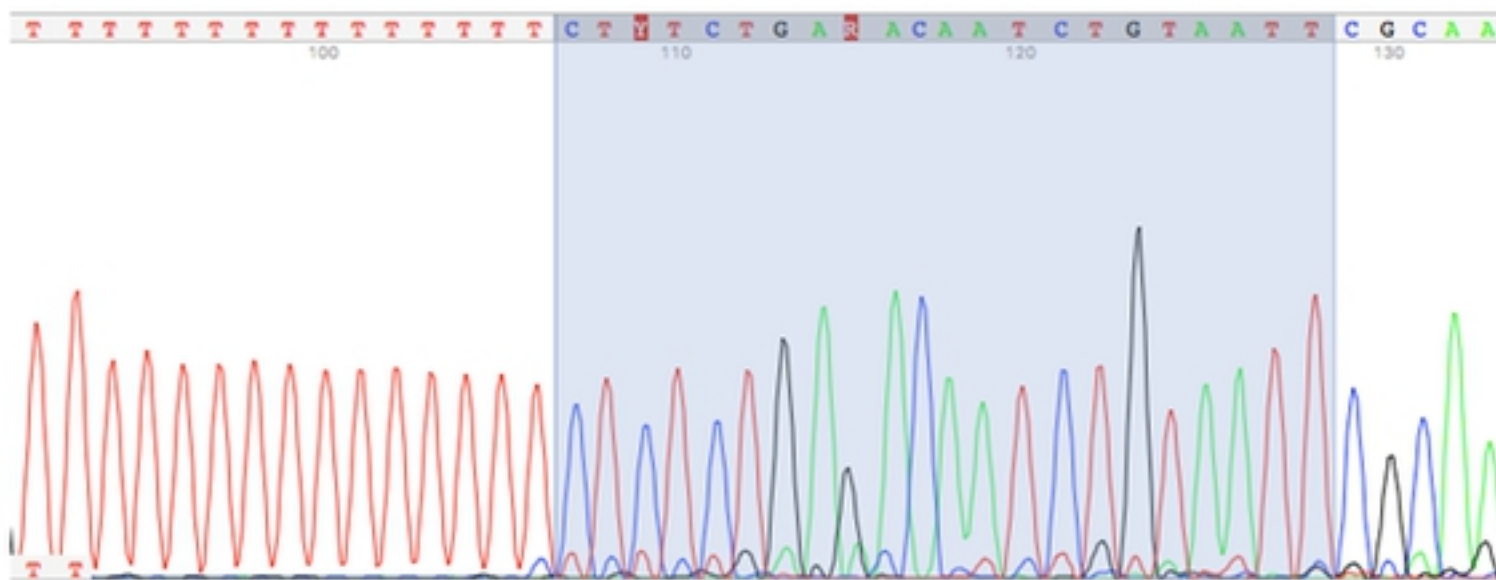



Figure 3

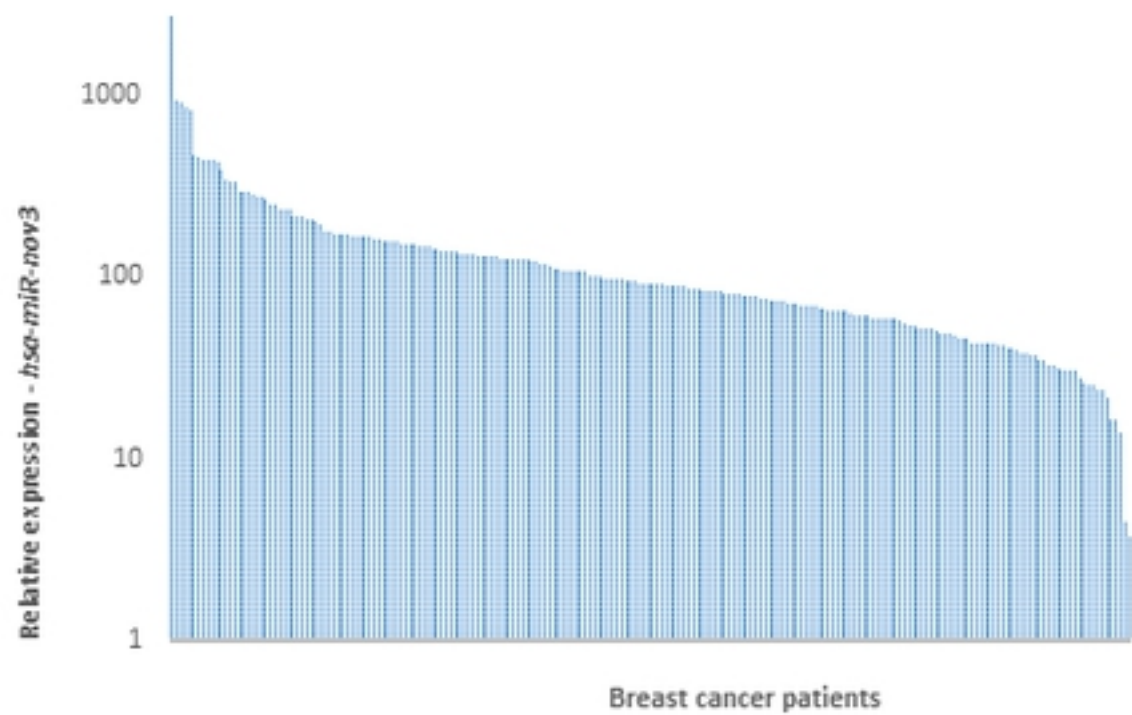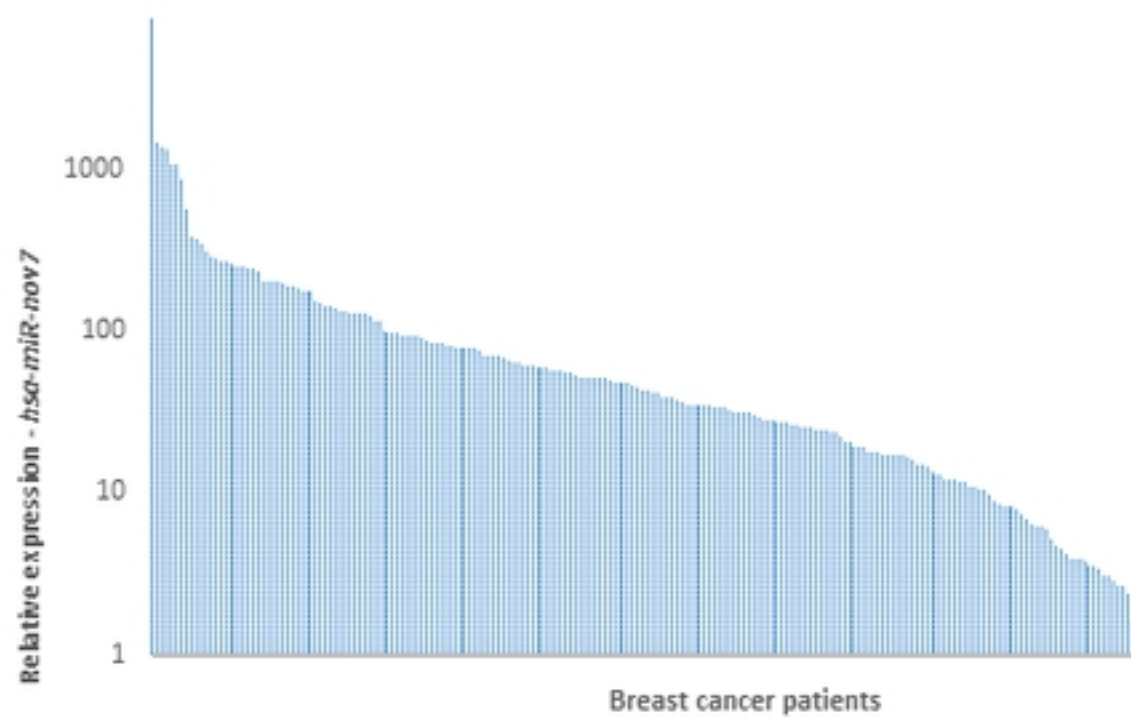

Figure

Figure 4

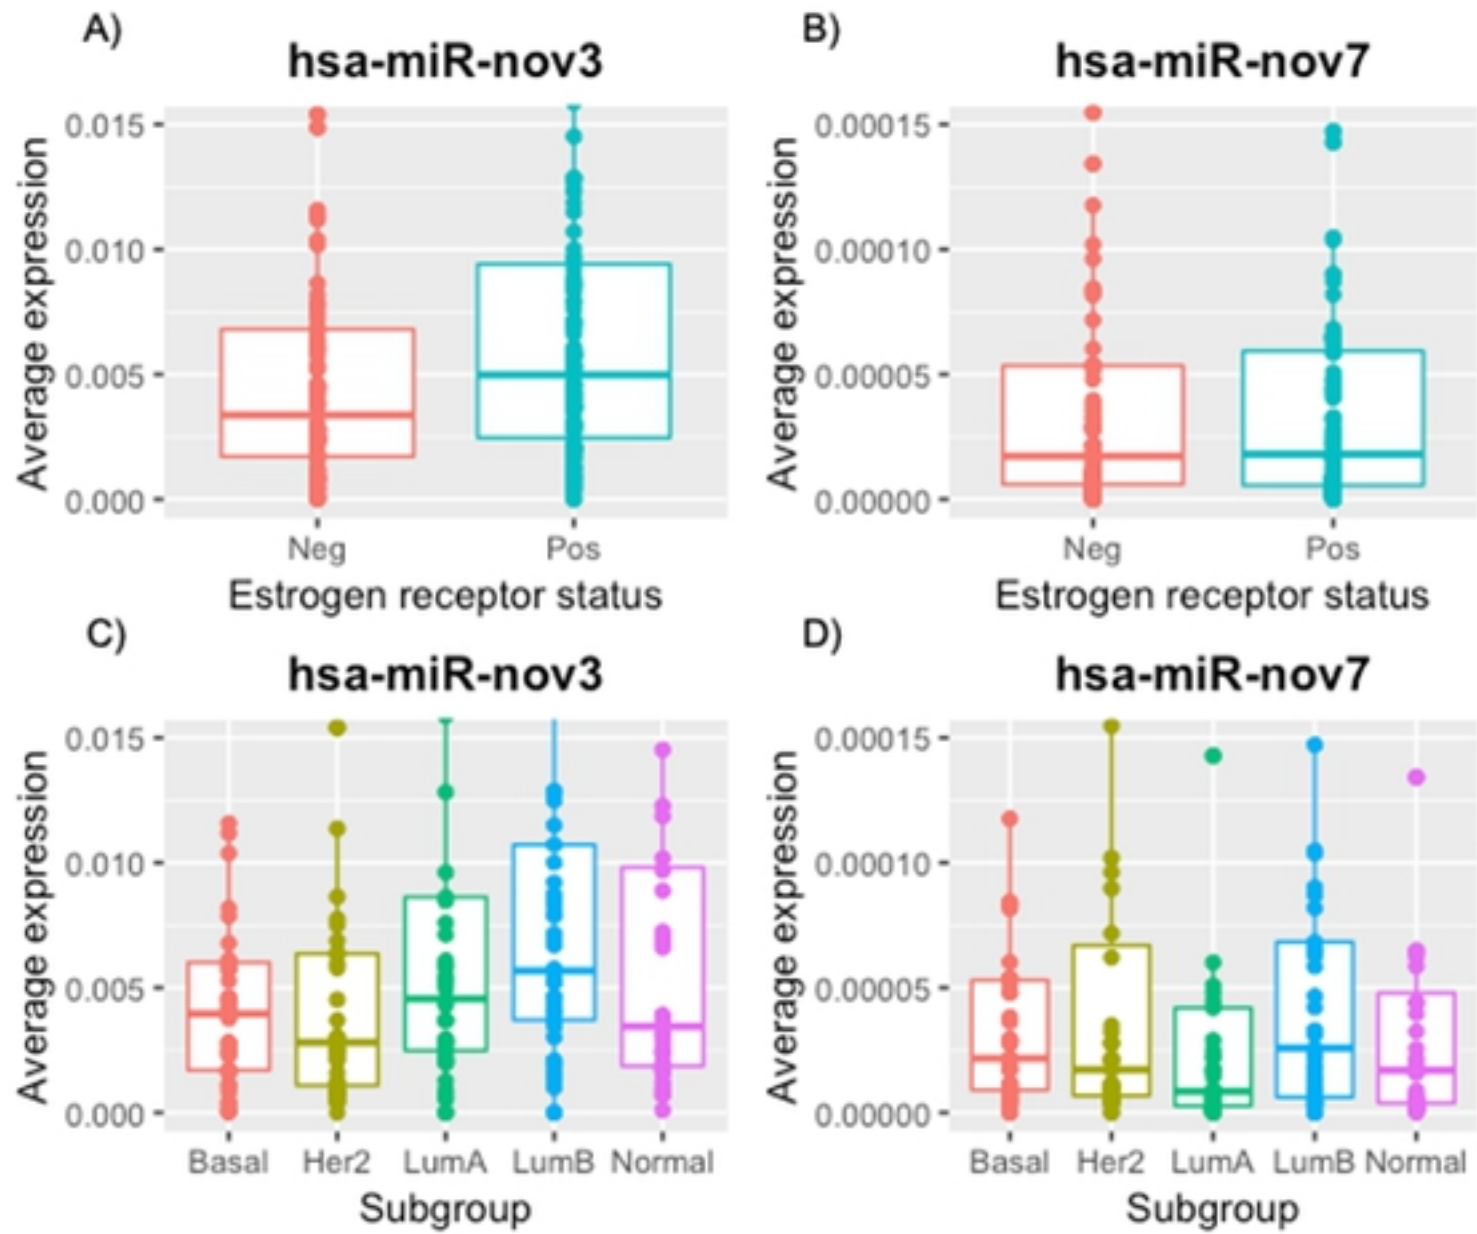

Figure 5

A)

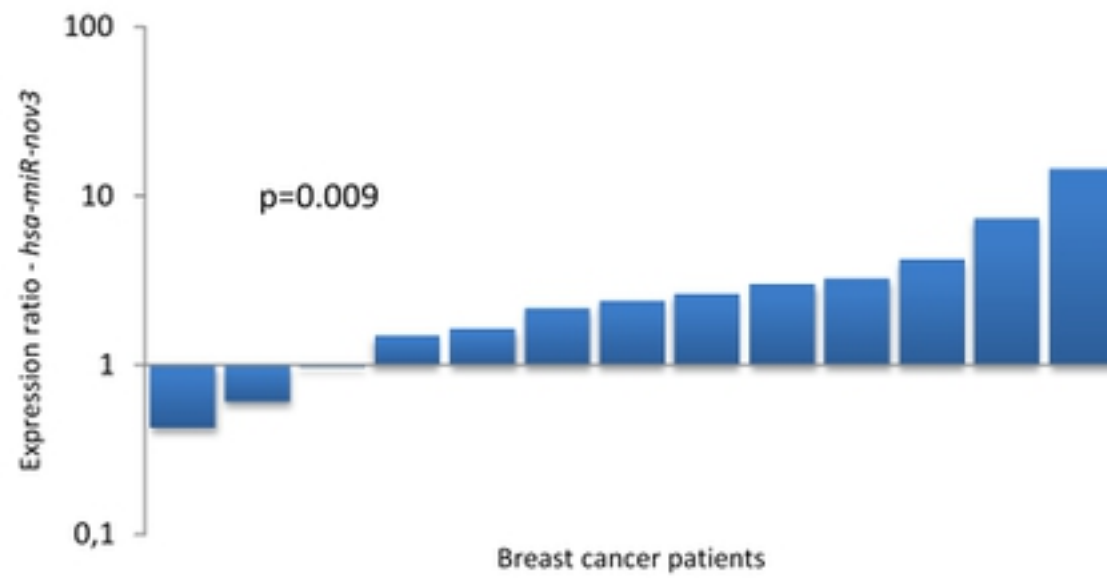

B)

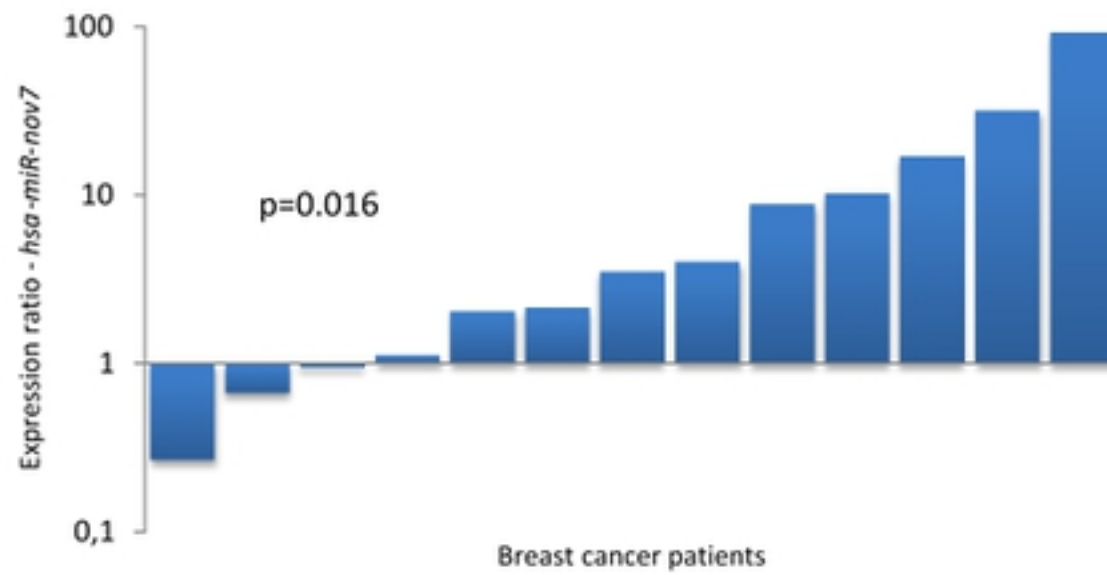

Figure 6

A)  
*hsa-mir-nov3*

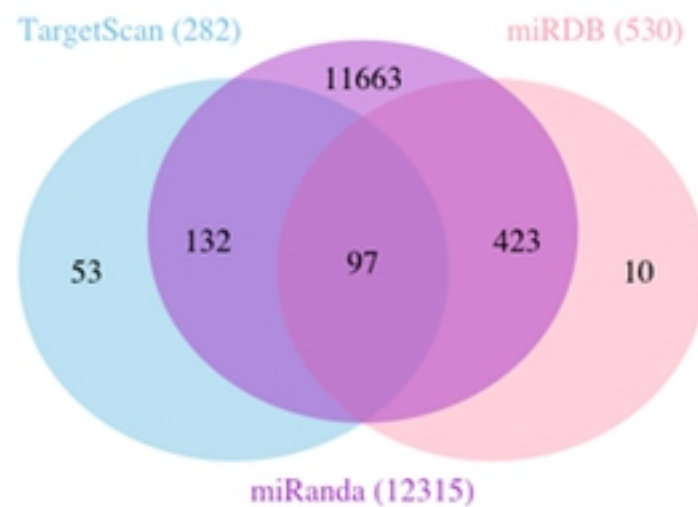

B)  
*hsa-mir-nov7*

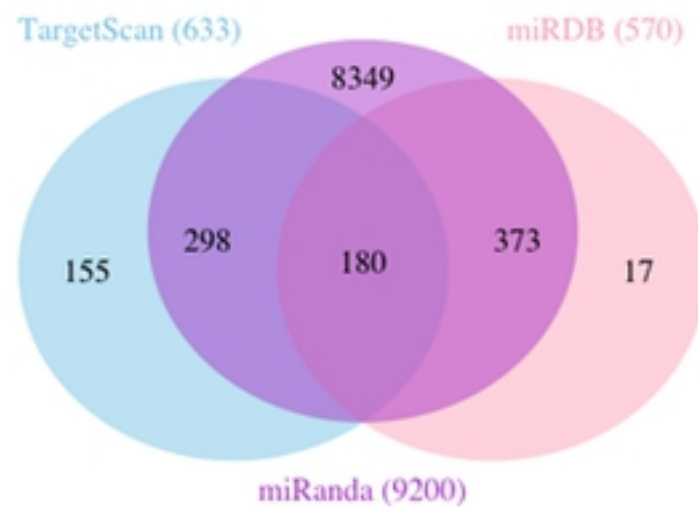

Figure 7

A)  
*hsa-miR-nov3*

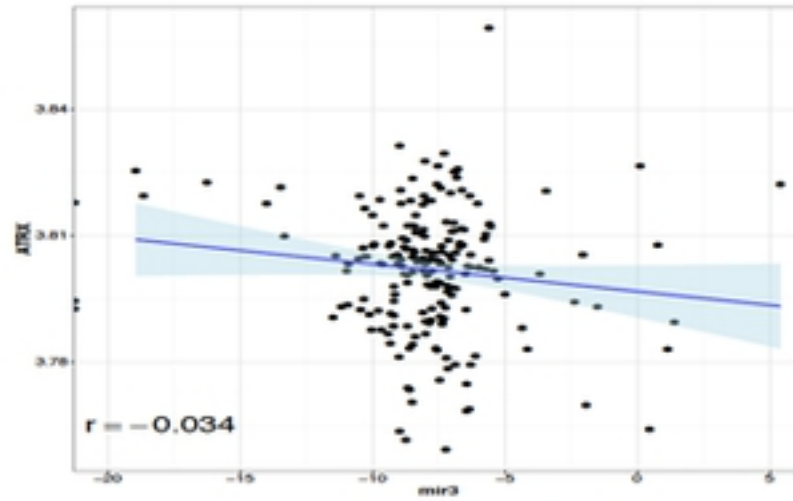

B)  
*hsa-miR-nov7*

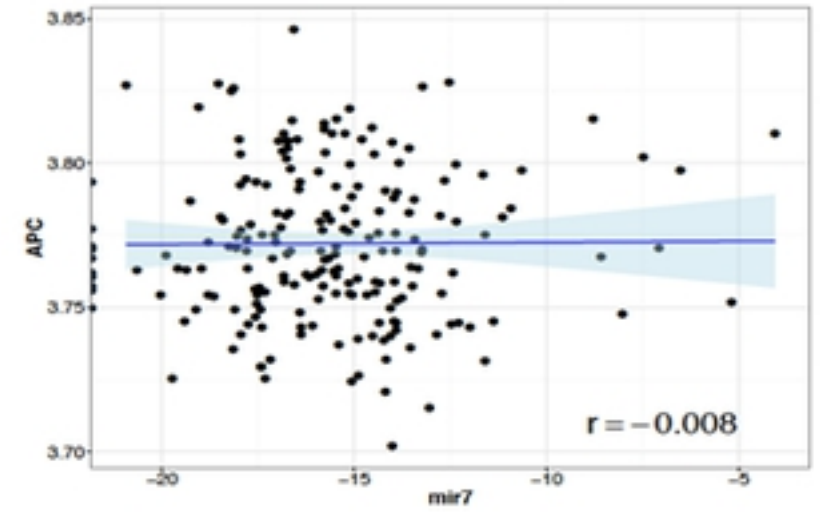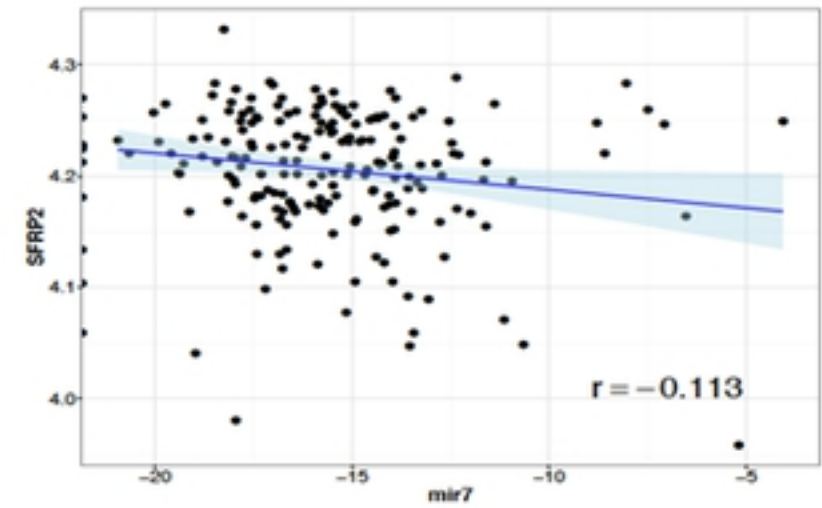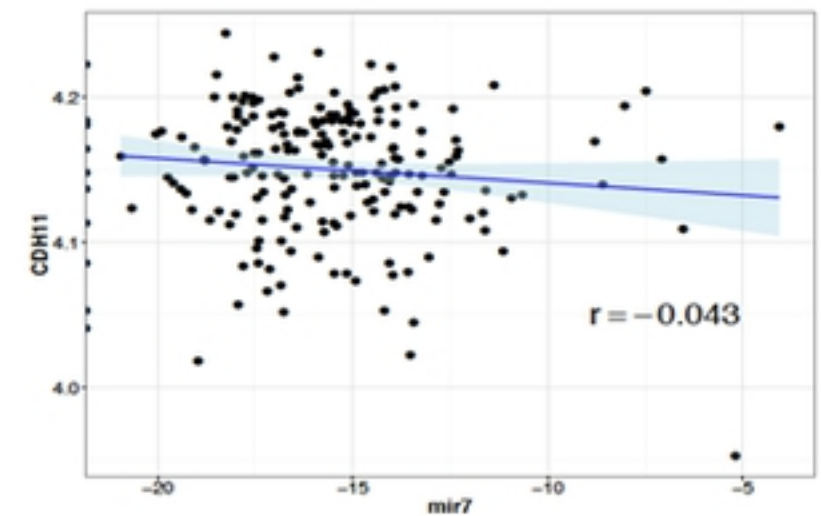

Figure 8

(A) hsa-miR-nov3

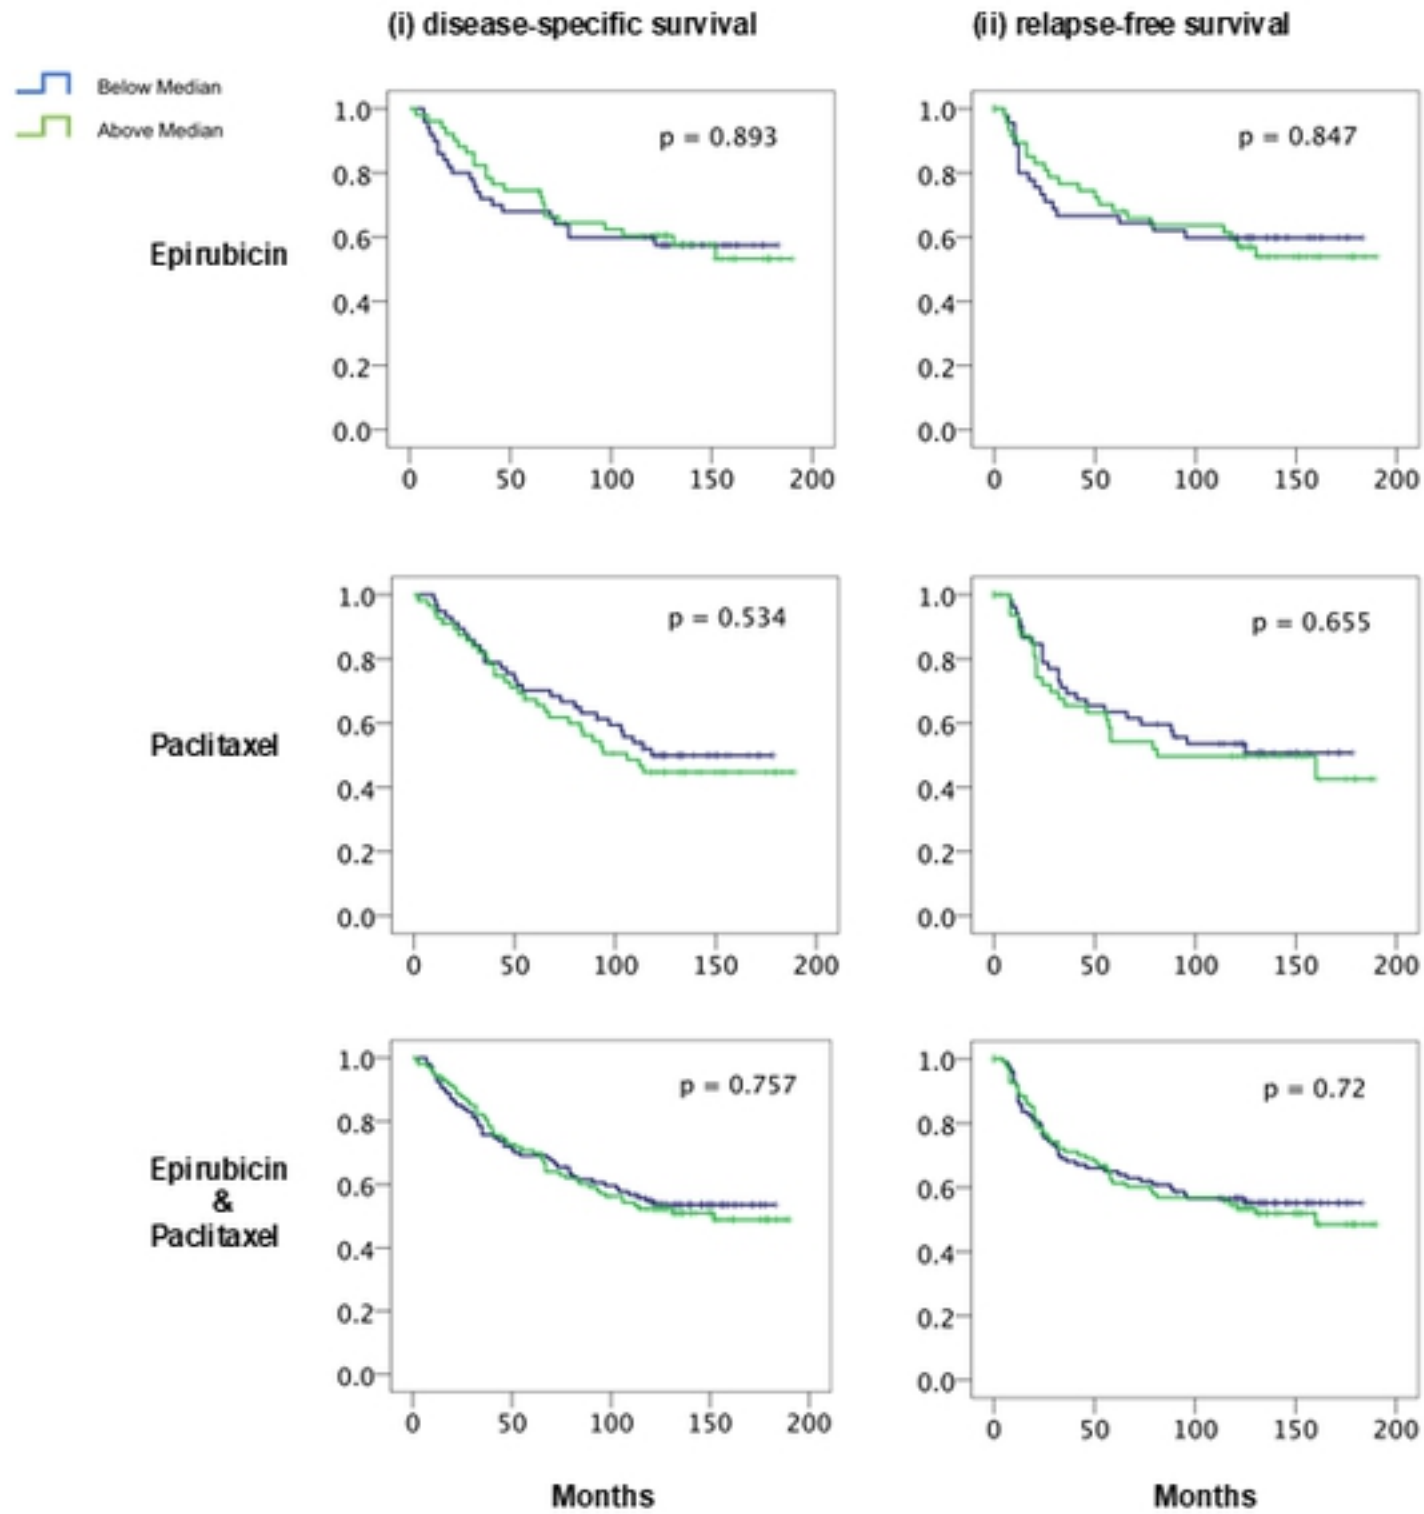

(B) hsa-miR-nov7

Below Median  
Above Median

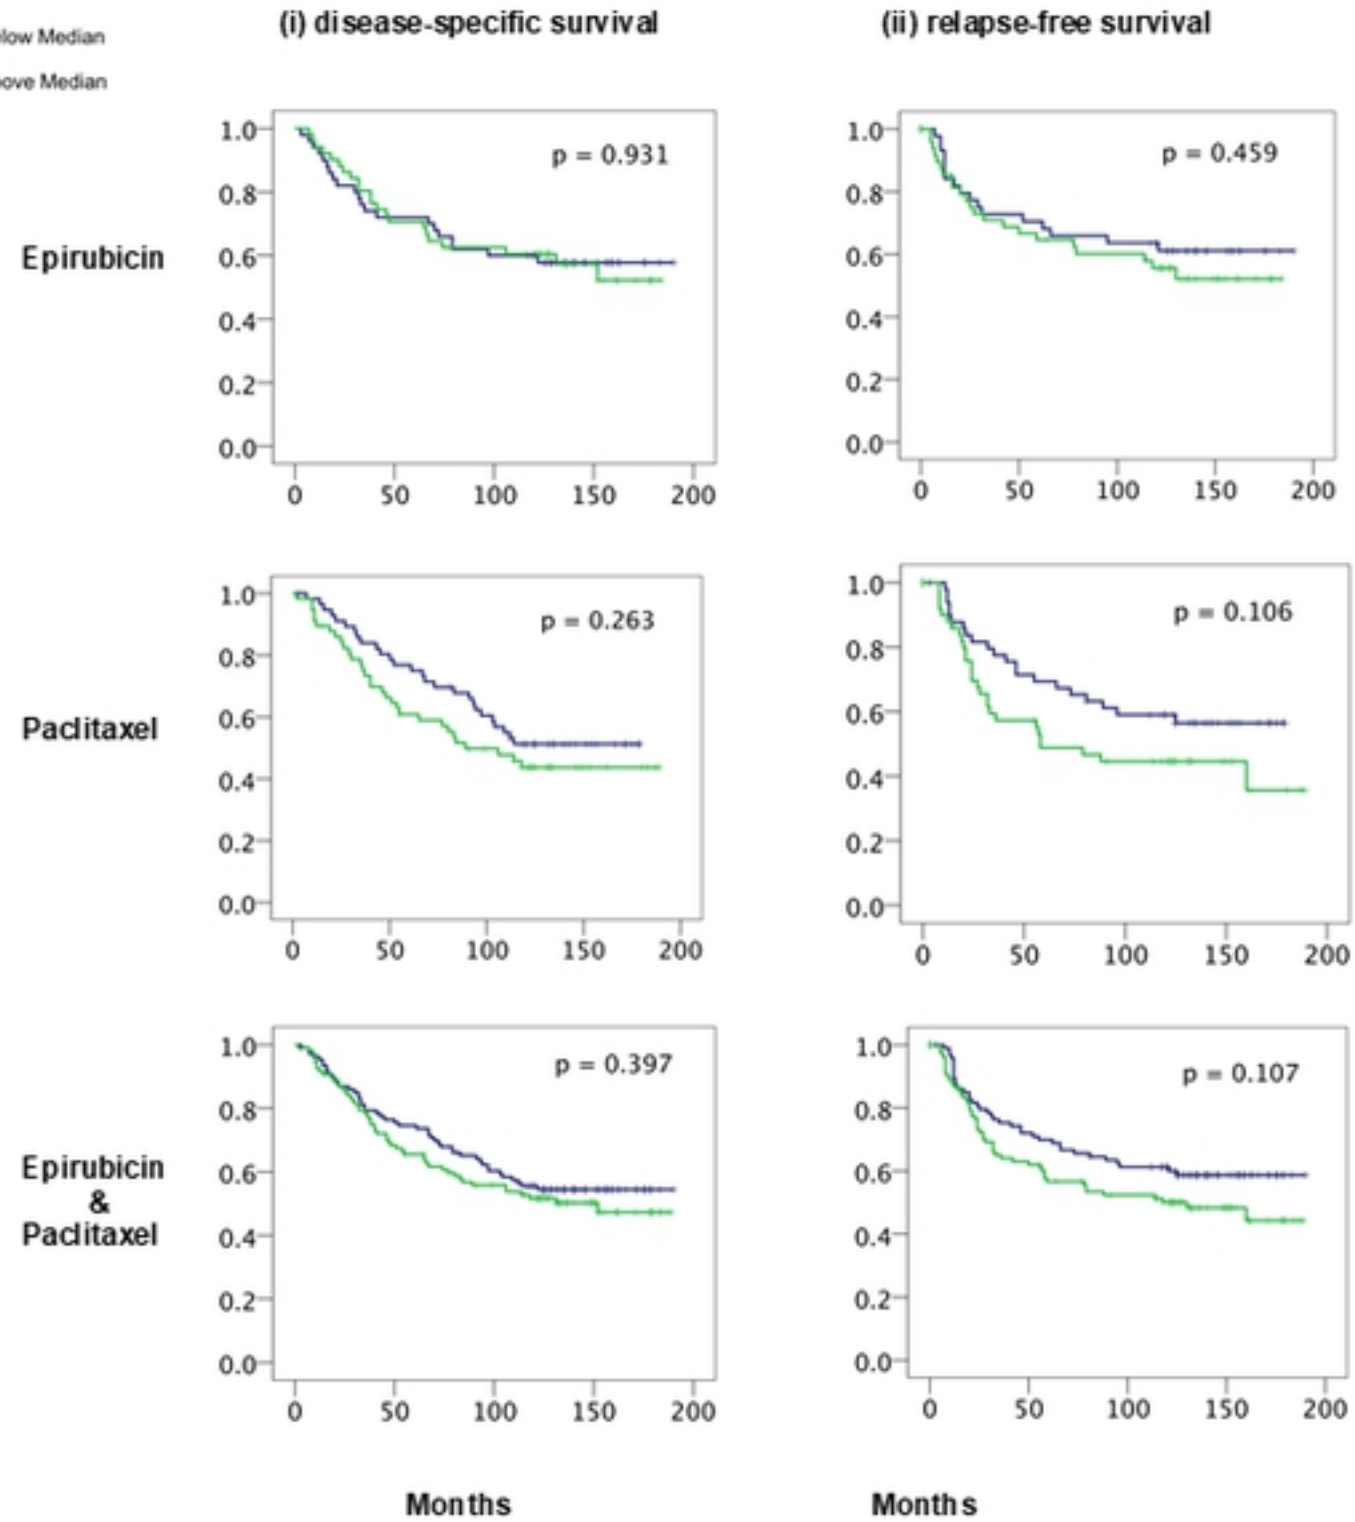

Figure
